# Supplementary material for: Cytokine-armed dendritic cell progenitors for antigen-agnostic cancer immunotherapy
Source: PubMed Central journal article supplement (PMC10899110; doi:10.1038/s43018-023-00668-y), 2023-11-23
Supplement: 43018_2023_668_MOESM1_ESM.pdf [file 43018_2023_668_MOESM1_ESM.pdf]

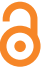

---

# Cytokine-armed dendritic cell progenitors for antigen-agnostic cancer immunotherapy

Contribution of donor-derived (CD45.1+) cells to cDC1, cDC2 and DN cDCs in spleen

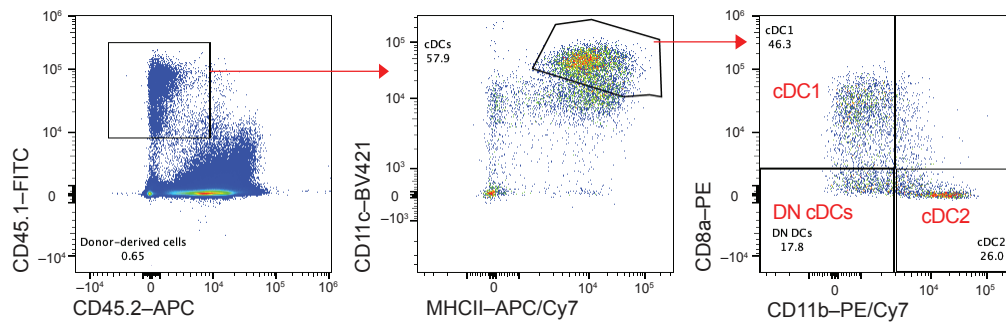

Donor chimerism in cDC1 and cDC2 in spleen

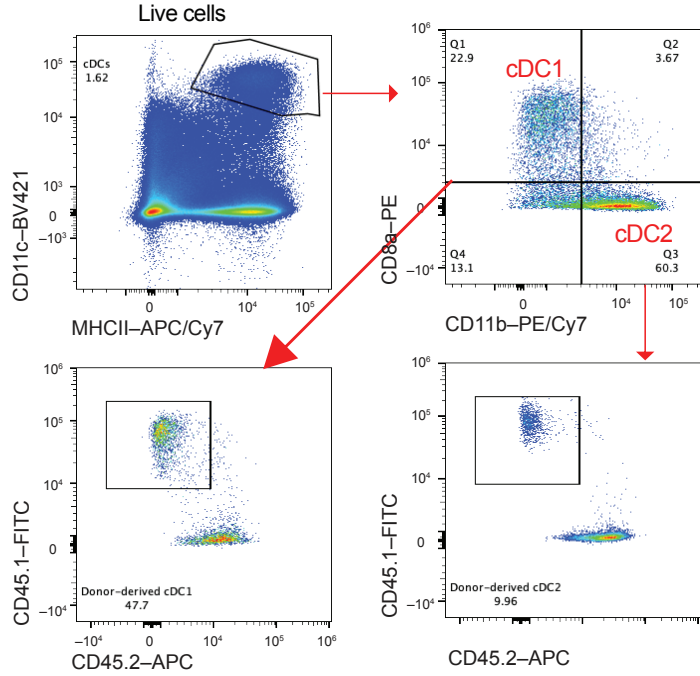

Donor chimerism in cDC1, cDC2, and macrophages in tumor

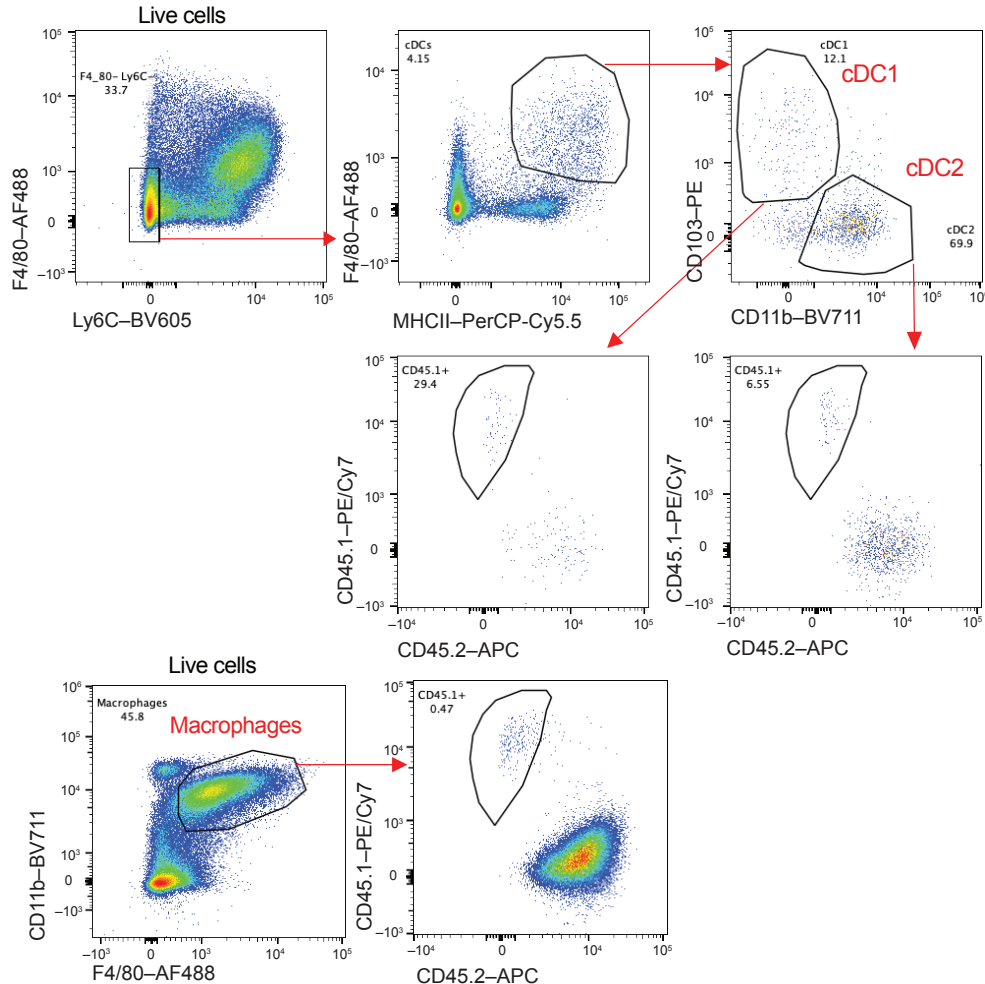

Supplementary Fig. 1: Gating strategy to identify donor chimerism in spleen and tumor.

Donor-derived (CD45.1+) cells in lung, tumor, liver, and BM

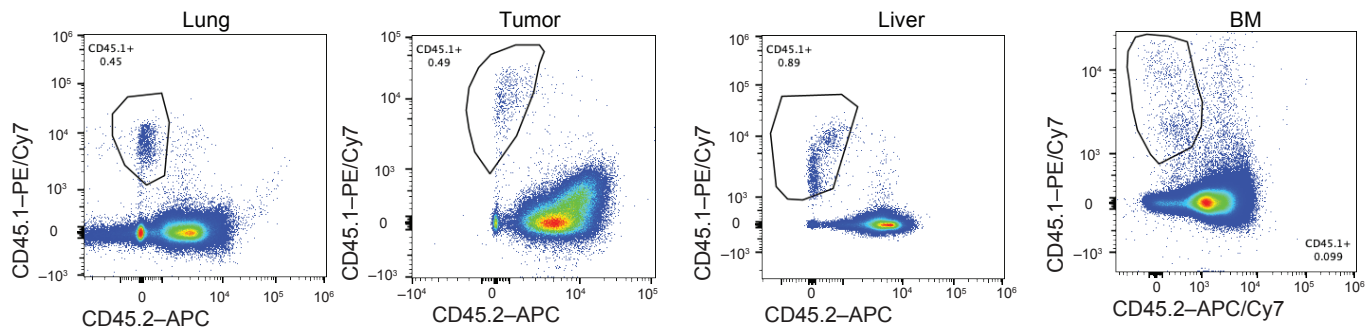

Donor chimerism in cDC1, cDC2, and macrophages in lung

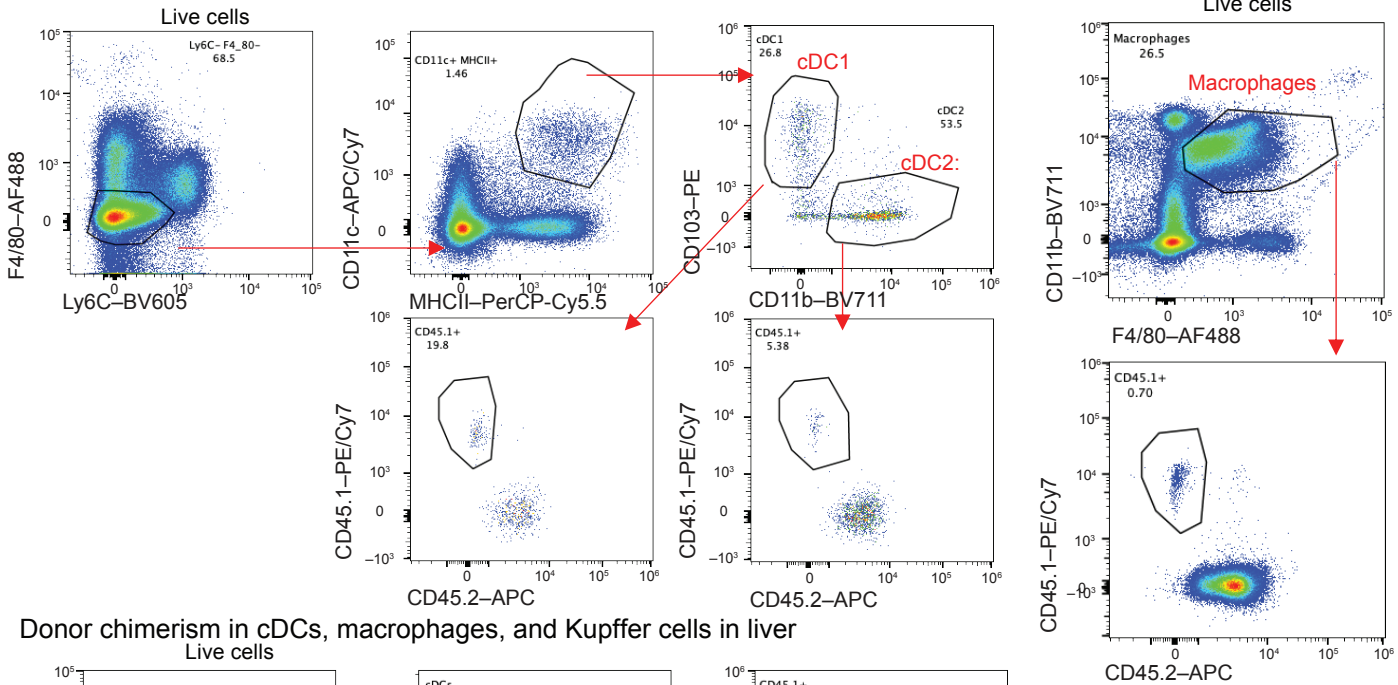

Donor chimerism in cDCs, macrophages, and Kupffer cells in liver

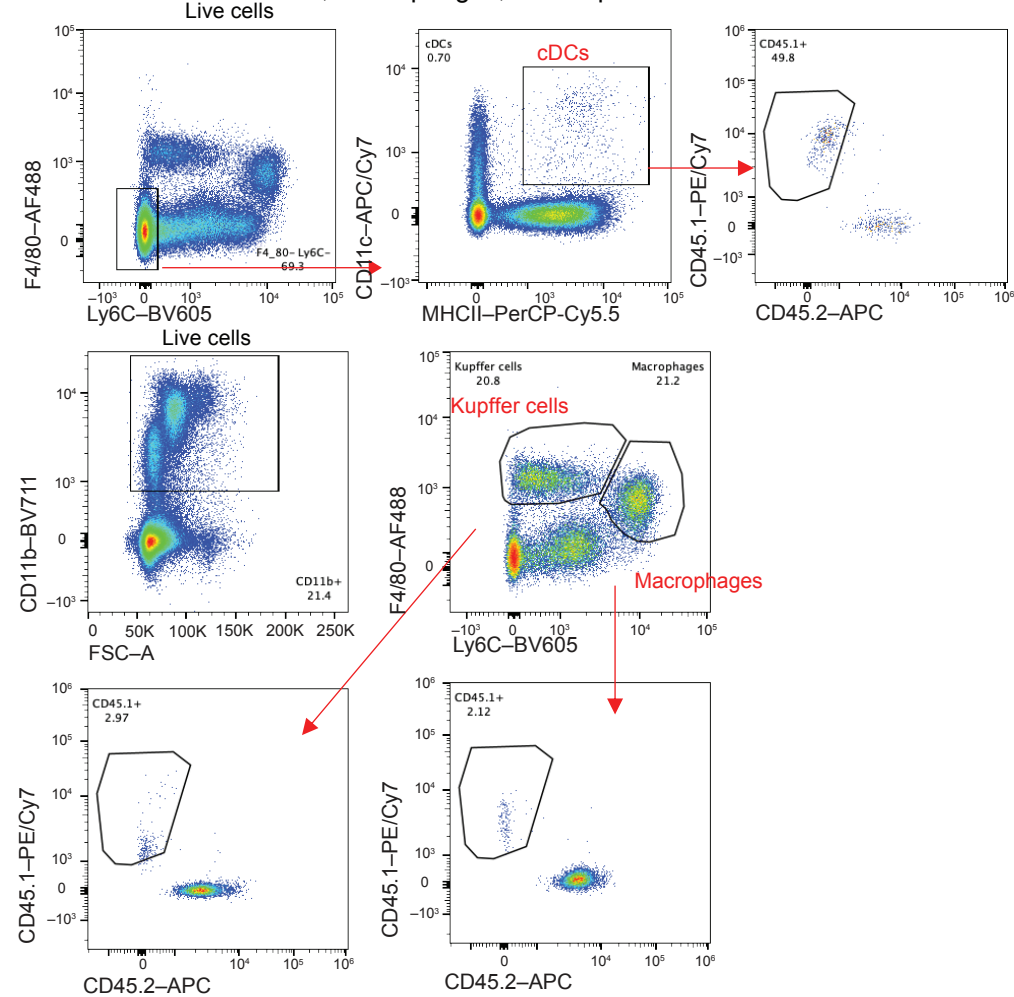

Supplementary Fig. 2: Gating strategy to identify donor chimerism in lung and liver.

### M1-like macrophages in tumor

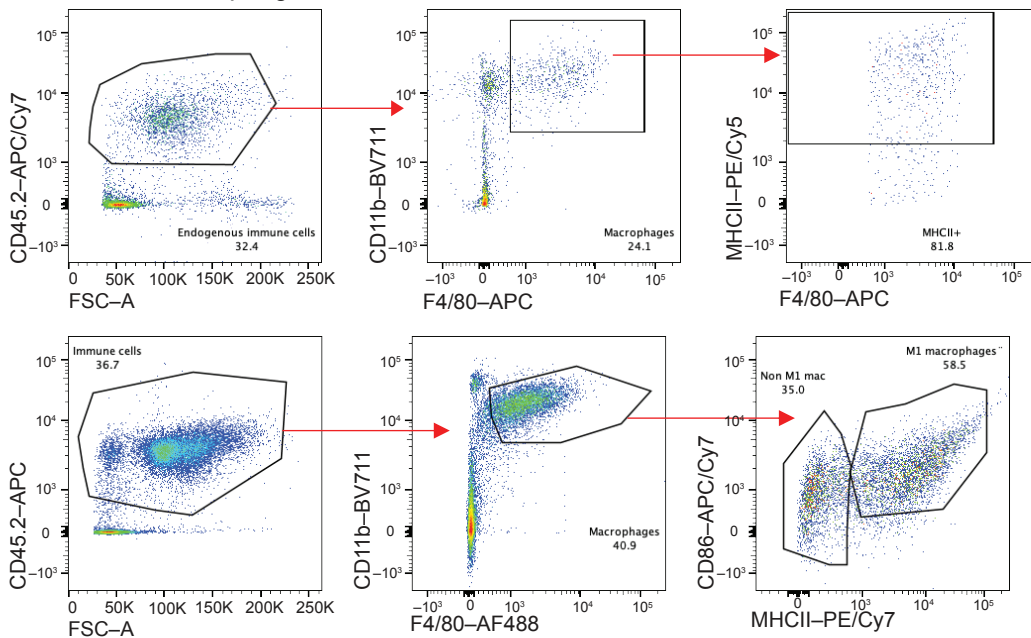

### CD4+ or CD8+, CD3+ T cells in CD45+ cells in tumor

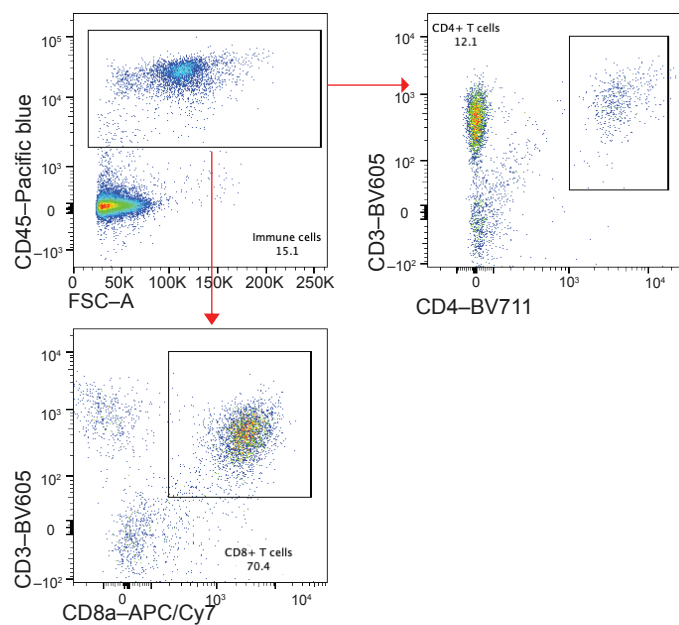

### CD4+ or CD8+, CD3+ T cells in CD45+/CD11b- cells in tumor

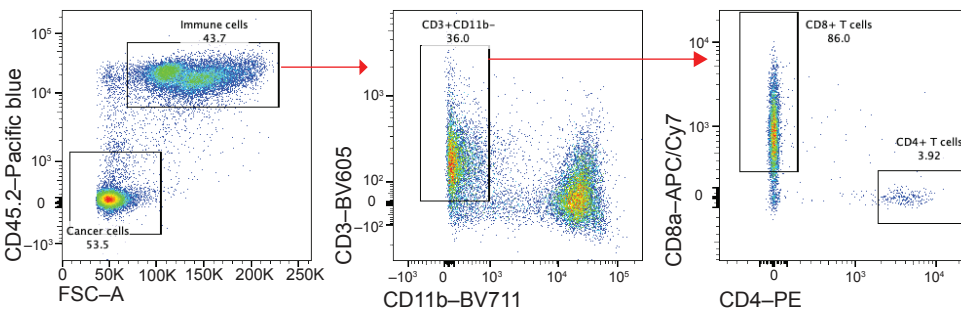

### CD4+ or CD8+, CD3+ T cells in CD45+/NK1.1- cells in tumor

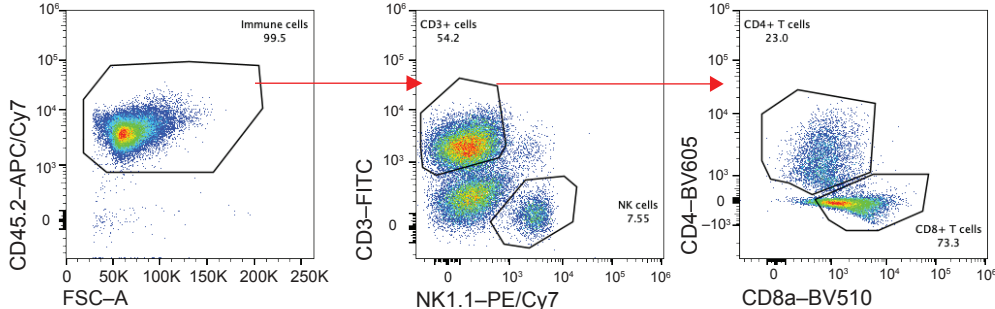

**Supplementary Fig. 3:** Gating strategy to identify T cells and macrophages in tumor.

### Activated or exhausted CD8+ T cells in tumor

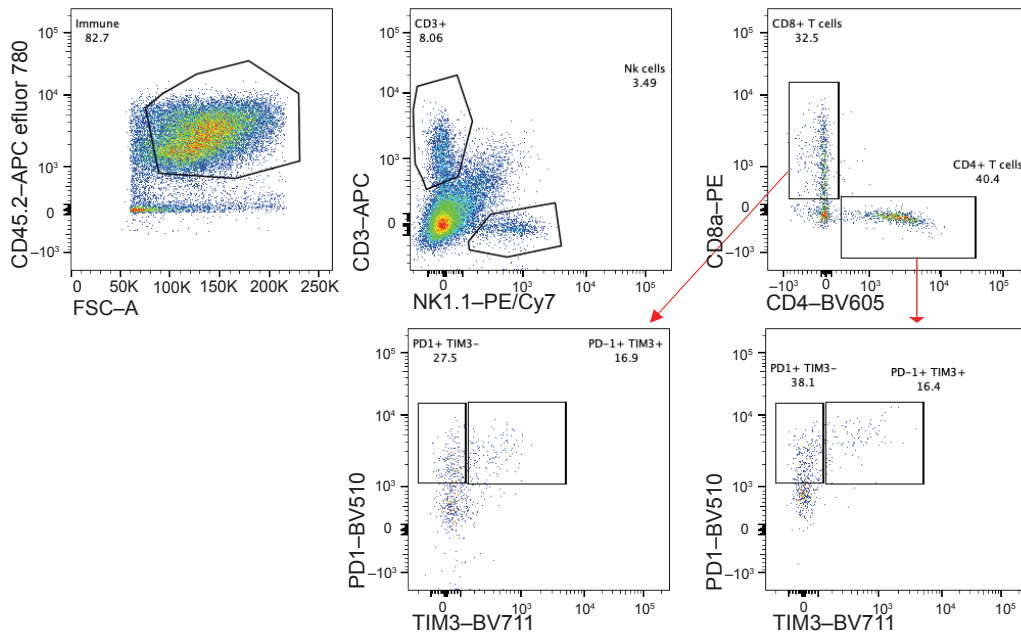

### NK1.1+/CD3- or NK1.1+/CD11b- NK cells or NKT cells in CD45+ cells

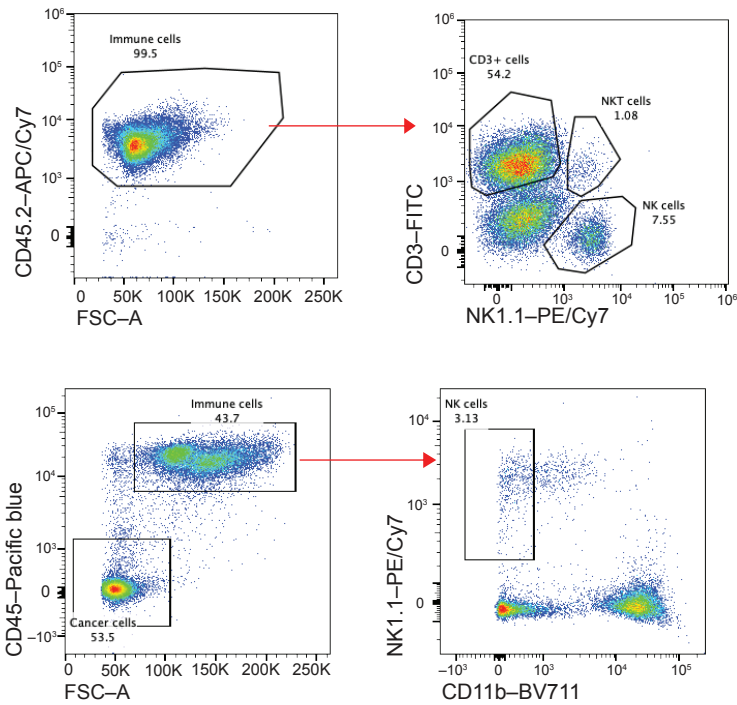

**Supplementary Fig. 4:** Gating strategy to identify T cell activation/exhaustion and NK/NKT cells in tumor.

CD8+ or CD4+ T effector cells in tdLN

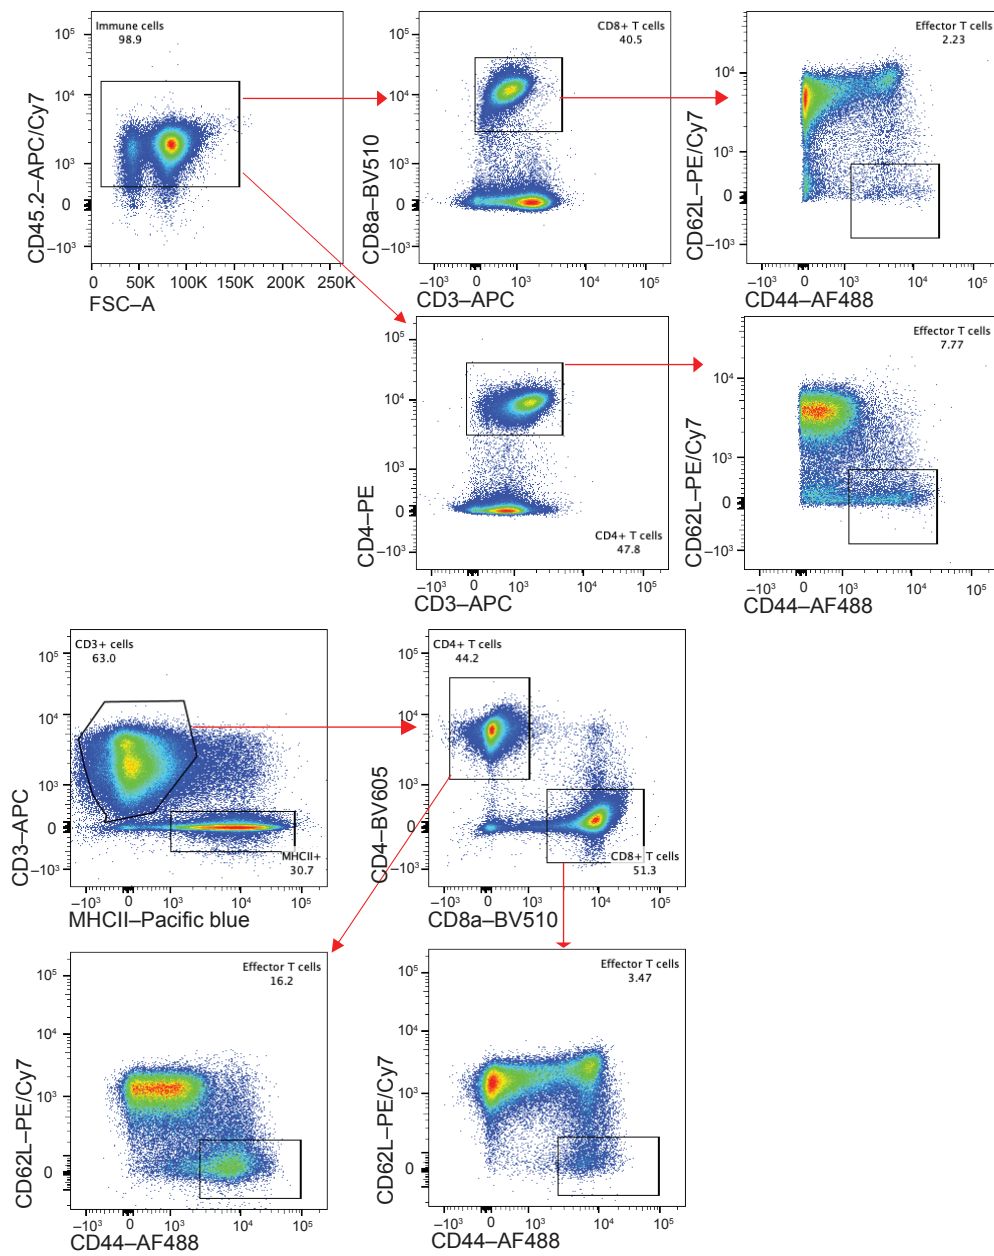

Myeloid cells in liver

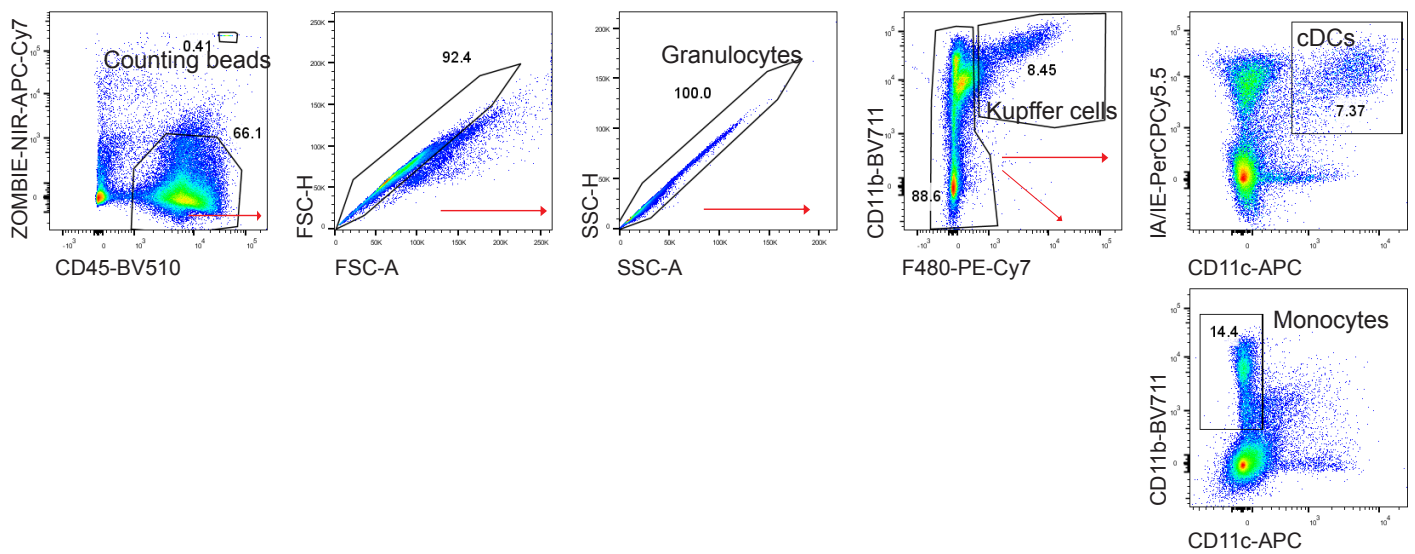

**Supplementary Fig. 5:** Gating strategy to identify T cells with effector phenotype in tdLN and Myeloid cells in liver.

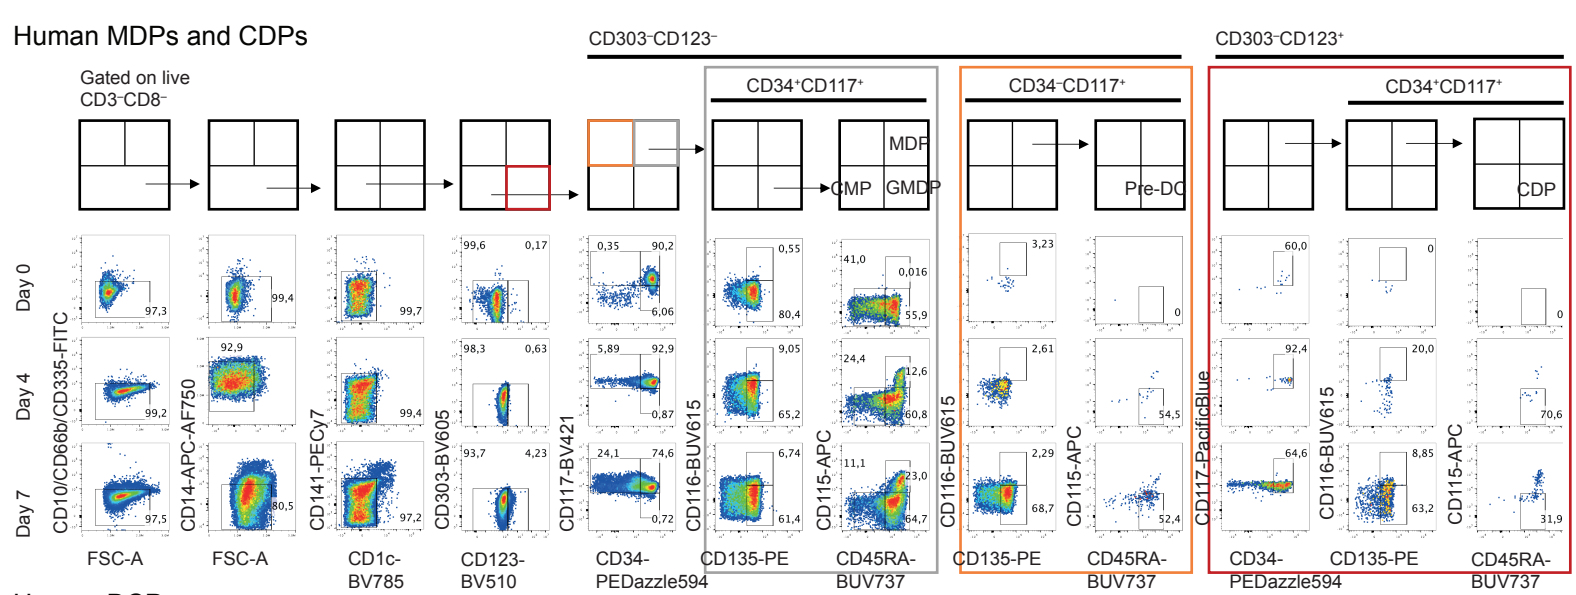

### Human DCPs

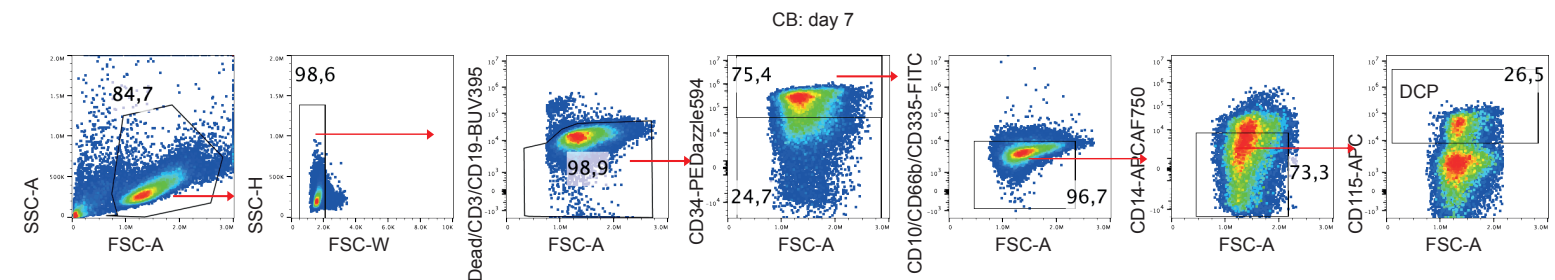

### Human DCP-derived cells (cDC1, cDC2 and other cells)

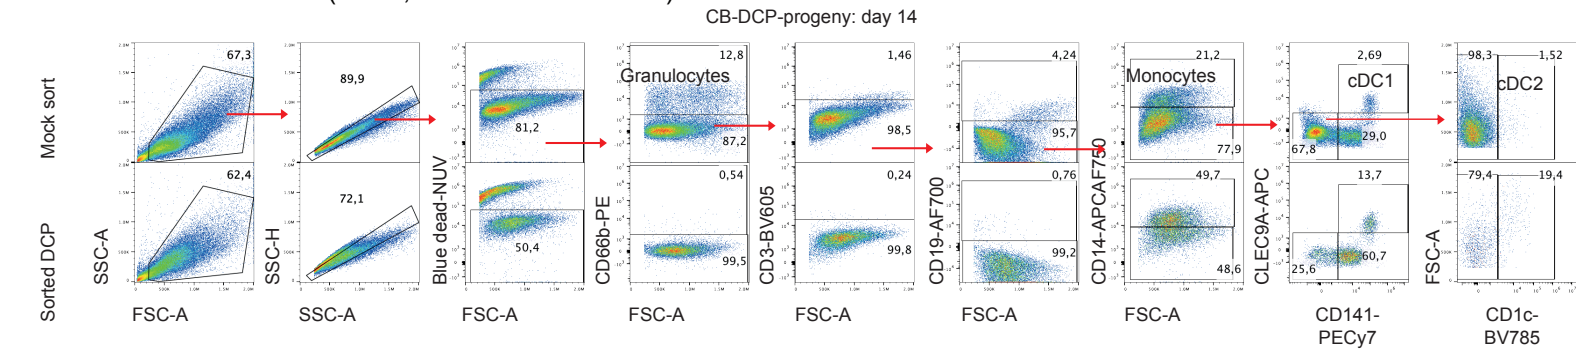

### Human DCP-derived cells (cDC1, cDC2 and other cells)

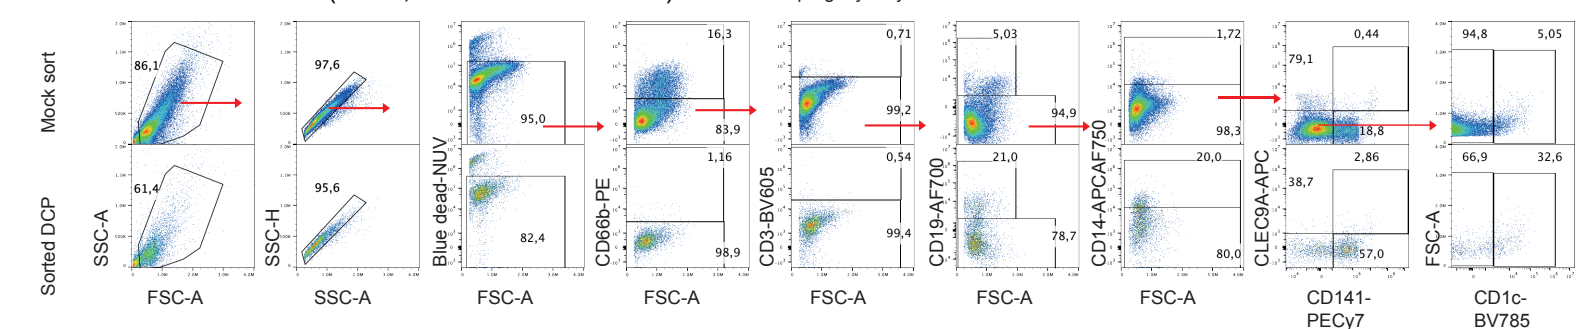

### Live cells in human moDCs

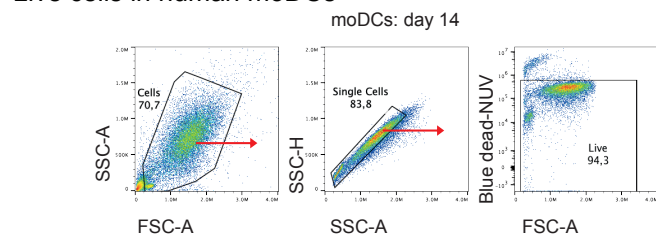

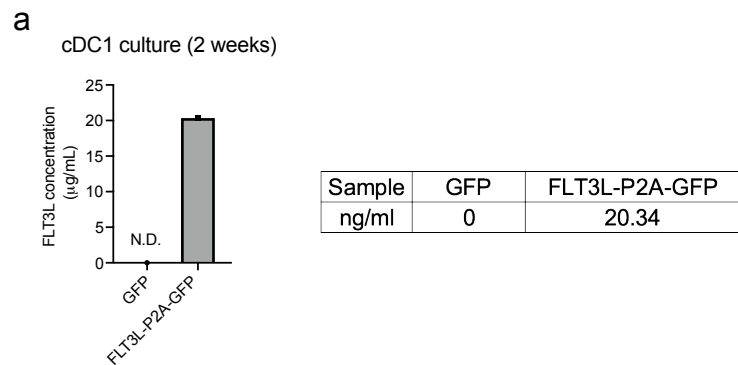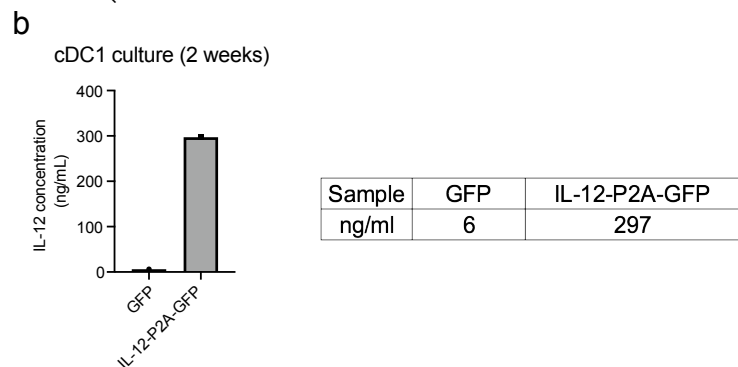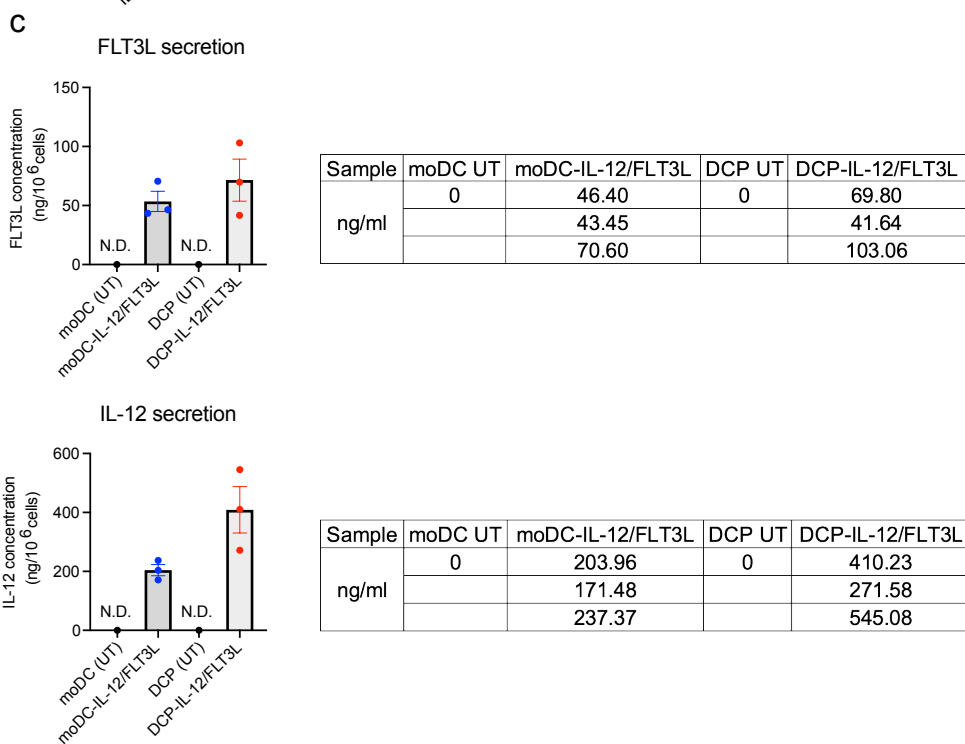

**Supplementary Fig. 7:** Quantification of FLT3L and IL-12 in medium conditioned by transduced DCPs or moDCs, according to ELISA. **a**, ELISA of FLT3L secreted by transduced HSPC-derived cells. **b**, ELISA of IL-12 secreted by transduced HSPC-derived cells. **c**, ELISA of FLT3L and IL-12 secreted by DCP-IL-12/FLT3L and moDC-IL-12/FLT3L. Data indicate mean values +/- SEM. Individual dots indicate independent cell cultures transduced at the same time.



Supplementary Table 1

| FLOW CYTOMETRY |                   |             |             |                         |             |               |                                                                                                                                                                    |
|----------------|-------------------|-------------|-------------|-------------------------|-------------|---------------|--------------------------------------------------------------------------------------------------------------------------------------------------------------------|
| Antigen        | Fluorochrome      | Reactivity  | Clone       | Provider                | Reference   | Dilution used | Validation                                                                                                                                                         |
| BDCA3/CD303    | Bright Violet 605 | Human       | 201A        | BD Biosciences          | 354223      | 1:100         | https://www.bdbiosciences.com/en-us/products/bright-violet-605-anti-human-cd303-bdca-2-antibody-13062                                                              |
| BDCA3/CD141    | PE-Cy7            | Human       | M60         | BD Biosciences          | 344109      | 1:400         | https://www.bdbiosciences.com/en-us/products/pe-cy7-anti-human-cd141-brn10monoclonal-antibody-8521                                                                 |
| BDCA3/CD10c    | Bright Violet 785 | Human       | H1420       | BD Biosciences          | 3311643     | 1:100         | https://www.bdbiosciences.com/en-us/products/bright-violet-785-anti-human-cd10c-antibody-7137                                                                      |
| CD10           | FITC              | Human       | H110a       | BD Biosciences          | 982204      | 1:100         | https://www.bdbiosciences.com/en-us/products/fic-anti-human-cd10-antibody-14046                                                                                    |
| CD103          | Bright Violet 605 | Mouse       | 2E7         | BD Biosciences          | 121433      | 1:100         | https://www.bdbiosciences.com/en-us/products/bright-violet-605-anti-mouse-cd103-antibody-13558                                                                     |
| CD103          | Bright Violet 711 | Mouse       | 2E7         | BD Biosciences          | 121436      | 1:100         | https://www.bdbiosciences.com/en-us/products/bright-violet-711-anti-mouse-cd103-antibody-144117GroupD-BLG4646                                                      |
| CD103          | FITC              | Mouse       | 2E7         | BD Biosciences          | 121420      | 1:200         | https://www.bdbiosciences.com/en-us/products/fic-anti-mouse-cd103-antibody-7053GroupD-GROUP20                                                                      |
| CD103          | PE                | Mouse       | 2E7         | BD Biosciences          | 121406      | 1:100         | https://www.bdbiosciences.com/en-us/products/pe-anti-mouse-cd103-antibody-3574GroupD-GROUP20                                                                       |
| CD115          | APC               | Human       | A1528       | ThermoFisher Scientific | 171110      | 1:100         | https://www.thermofisher.com/antibody/product/CD115-Antibody-clone-A1528-Monoclonal-17-1152-82                                                                     |
| CD115          | APC               | Human       | 9-4D2-1E4   | BD Biosciences          | 347306      | 1:50          | https://www.bdbiosciences.com/en-us/products/pe-anti-human-cd115-cl-1f-1-antibody-8783                                                                             |
| CD117          | Bright Violet 421 | Human       | 104D2       | BD Biosciences          | 313215      | 1:50          | https://www.bdbiosciences.com/en-us/products/bright-violet-421-anti-human-cd117-c-4k-antibody-7348                                                                 |
| CD118          | Bright Violet 510 | Mouse       | M170        | BD Biosciences          | 101263      | 1:100         | https://www.bdbiosciences.com/en-us/products/bright-violet-510-anti-mouse-human-cd118-antibody-7693                                                                |
| CD118          | Bright Violet 605 | Human/Mouse | M170        | BD Biosciences          | 101239      | 1:400         | https://www.bdbiosciences.com/en-us/products/bright-violet-605-anti-mouse-human-cd118-antibody-7638                                                                |
| CD118          | Bright Violet 711 | Human/Mouse | M170        | BD Biosciences          | 101241      | 1:200         | https://www.bdbiosciences.com/en-us/products/bright-violet-711-anti-mouse-human-cd118-antibody-7697                                                                |
| CD118          | PE-Cy7            | Human       | M170        | BD Biosciences          | 25-0112-82  | 1:400         | https://www.thermofisher.com/antibody/product/CD118-Antibody-clone-M170-Monoclonal-25-0112-82                                                                      |
| CD11c          | APC               | Mouse       | N418        | BD Biosciences          | 117309      | 1:200         | https://www.bdbiosciences.com/en-us/products/apc-anti-mouse-cd11c-antibody-1813                                                                                    |
| CD11c          | APC-Cy7           | Mouse       | N418        | BD Biosciences          | 117324      | 1:100         | https://www.bdbiosciences.com/en-us/products/apc-cy7-anti-mouse-cd11c-antibody-3931GroupD-BLG11937                                                                 |
| CD11c          | Bright Violet 421 | Mouse       | N418        | BD Biosciences          | 117330      | 1:100         | https://www.bdbiosciences.com/en-us/products/bright-violet-421-anti-mouse-cd11c-antibody-7497GroupD-BLG11937                                                       |
| CD11c          | Bright Violet 605 | Mouse       | N418        | BD Biosciences          | 117333      | 1:100         | https://www.bdbiosciences.com/en-us/products/bright-violet-605-anti-mouse-cd11c-antibody-8840GroupD-BLG11937                                                       |
| CD11c          | Bright Violet 711 | Mouse       | N418        | BD Biosciences          | 301637      | 1:50          | https://www.bdbiosciences.com/en-us/products/bright-violet-711-anti-mouse-cd11c-antibody-8642                                                                      |
| CD11c          | PE-Dazzle594      | Human       | S-9         | BD Biosciences          | 301641      | 1:100         | https://www.bdbiosciences.com/en-us/products/pe-dazzle-594-anti-human-cd11c-antibody-10234                                                                         |
| CD11c          | PE-Dazzle594      | Human       | 3-9         | BD Biosciences          | 301641      | 1:100         | https://www.bdbiosciences.com/en-us/products/pe-dazzle-594-anti-human-cd11c-antibody-10234                                                                         |
| CD11c          | PE                | Human       | HM3-SFR-M1  | BD Biosciences          | 731335      | 1:200         | https://www.bdbiosciences.com/en-us/products/reagents/flow-cytometry-reagents/research-reagents/single-color-antibodies-ruo/bv615-mouse-anti-human-cd11c-16.751535 |
| CD123          | Bright Violet 510 | Human       | 6H6         | BD Biosciences          | 306021      | 1:200         | https://www.bdbiosciences.com/en-us/products/bright-violet-510-anti-human-cd123-antibody-8524                                                                      |
| CD135          | PE                | Human       | 4G8         | BD Biosciences          | 589896      | 1:50          | https://www.bdbiosciences.com/en-us/products/reagents/flow-cytometry-reagents/research-reagents/single-color-antibodies-ruo/pe-mouse-anti-human-cd135-558996       |
| CD14           | APC-F470          | Human       | TuK4        | ThermoFisher Scientific | MHC1427     | 1:400         | https://www.thermofisher.com/antibody/product/CD14-Antibody-clone-TuK4-Monoclonal-MHC1427                                                                          |
| CD14           | AF70              | Human       | SJ26C1      | Invitrogen              | 56019842    | 1:50          | https://www.thermofisher.com/antibody/product/CD14-Antibody-clone-SJ26C1-Monoclonal-56-0198-42                                                                     |
| CD19           | APC               | Human       | 5D5         | BD Biosciences          | 301919      | 1:100         | https://www.bdbiosciences.com/en-us/products/apc-cy7-anti-human-cd19-antibody-3293                                                                                 |
| CD271 (LNFR)   | APC               | Human       | ME20.4-1.H4 | MACS                    | 130-113-418 | 1:200         | https://www.miltenyibiotec.com/CH/en/products/cd271-1ngfr-antibody-anti-human-me20-4-1-h4.html?conjugate=pc-ize-100-tests-in-20ul                                  |
| CD271 (LNFR)   | AF70              | Human       | ME20.4      | BD Biosciences          | 345117      | 1:100         | https://www.bdbiosciences.com/en-us/products/af70-anti-human-cd271-1ngfr-antibody-16283                                                                            |
| CD271 (LNFR)   | APC               | Human       | ME20.4-1.H4 | MACS                    | 130-113-418 | 1:200         | https://www.miltenyibiotec.com/CH/en/products/cd271-1ngfr-antibody-anti-human-me20-4-1-h4.html?conjugate=pc-ize-100-tests-in-20ul                                  |
| CD271 (LNFR)   | PE                | Human       | ME20.4-1.H4 | MACS                    | 130-113-421 | 1:200         | https://www.miltenyibiotec.com/CH/en/products/cd271-1ngfr-antibody-anti-human-me20-4-1-h4.html?conjugate=pc-ize-100-tests-in-20ul                                  |
| CD279          | Bright Violet 510 | Mouse       | 29F.142     | BD Biosciences          | 135241      | 1:100         | https://www.bdbiosciences.com/en-us/products/bright-violet-510-anti-mouse-cd279-pd-1-antibody-14923GroupD-BLG7928                                                  |
| CD279          | APC               | Mouse       | RMP130      | BD Biosciences          | 109104      | 1:100         | https://www.bdbiosciences.com/en-us/products/apc-anti-mouse-cd279-pd-1-antibody-4847GroupD-BLG7470                                                                 |
| CD279          | PE                | Mouse       | H43         | BD Biosciences          | 25-9985-82  | 1:100         | https://www.thermofisher.com/antibody/product/CD279-PD-1-Antibody-clone-H43-Monoclonal-25-9985-82                                                                  |
| CD3            | APC               | Mouse       | 17A2        | BD Biosciences          | 100236      | 1:100         | https://www.bdbiosciences.com/en-us/products/apc-anti-mouse-cd3-antibody-8055                                                                                      |
| CD3            | Bright Violet 605 | Mouse       | 17A2        | BD Biosciences          | 100237      | 1:100         | https://www.bdbiosciences.com/en-us/products/bright-violet-605-anti-mouse-cd3-antibody-85037GroupD-BLG6740                                                         |
| CD3            | Bright Violet 711 | Mouse       | 17A2        | BD Biosciences          | 100229      | 1:100         | https://www.bdbiosciences.com/en-us/products/bright-violet-711-anti-mouse-cd3-antibody-7847GroupD-BLG6242                                                          |
| CD3            | FITC              | Mouse       | 17A2        | BD Biosciences          | 100204      | 1:100         | https://www.bdbiosciences.com/en-us/products/fic-anti-mouse-cd3-antibody-457GroupD-BLG732                                                                          |
| CD3            | Bright Violet 605 | Human       | OKT3        | BD Biosciences          | 317421      | 1:100         | https://www.bdbiosciences.com/en-us/products/bright-violet-605-anti-human-cd3-antibody-7666                                                                        |
| CD3            | PE                | Human       | SK7         | BD Biosciences          | 300329      | 1:100         | https://www.bdbiosciences.com/en-us/products/pe-anti-human-cd3-antibody-3417                                                                                       |
| CD3            | PE                | Human       | SK7         | BD Biosciences          | 344805      | 1:100         | https://www.bdbiosciences.com/en-us/products/pe-anti-human-cd3-antibody-8511                                                                                       |
| CD3            | APC-F470          | Human       | SK7         | BD Biosciences          | 47-0036-41  | 1:100         | https://www.thermofisher.com/antibody/product/CD3-Antibody-clone-SK7-Monoclonal-47-0036-41                                                                         |
| CD3            | FITC              | Human       | UCHL1       | BD Biosciences          | 353544      | 1:100         | https://www.bdbiosciences.com/en-us/products/fic-anti-human-cd3-antibody-reagents/research-reagents/single-color-antibodies-ruo/bv395-mouse-anti-human-cd3-563548  |
| CD335          | FITC              | Human       | SE2         | BD Biosciences          | 331922      | 1:200         | https://www.bdbiosciences.com/en-us/products/fic-anti-human-cd335-anti-antibody-8484                                                                               |
| CD335          | PE                | Human       | SE2         | BD Biosciences          | 331907      | 1:200         | https://www.bdbiosciences.com/en-us/products/pe-anti-human-cd335-anti-antibody-4577                                                                                |
| CD34           | PE-Dazzle594      | Human       | 344833      | BD Biosciences          | 344833      | 1:100         | https://www.bdbiosciences.com/en-us/products/pe-dazzle-594-anti-human-cd34-antibody-10277                                                                          |
| CD366          | Bright Violet 711 | Mouse       | RMT-23      | BD Biosciences          | 119727      | 1:100         | https://www.bdbiosciences.com/en-us/products/bright-violet-711-anti-mouse-cd366-anti-antibody-149187GroupD-BLG10656                                                |
| CD4            | AF70              | Mouse       | RM-5        | BD Biosciences          | 100536      | 1:400         | https://www.bdbiosciences.com/en-us/products/af70-anti-mouse-cd4-antibody-33667GroupD-BLG4211                                                                      |
| CD4            | Alexa Fluor 488   | Mouse       | RM-5        | BD Biosciences          | 100536      | 1:100         | https://www.bdbiosciences.com/en-us/products/alexa-fluor-488-anti-mouse-cd4-antibody-33667GroupD-BLG4211                                                           |
| CD4            | AF70              | Mouse       | OK1.5       | BD Biosciences          | 100430      | 1:100         | https://www.bdbiosciences.com/en-us/products/af70-anti-mouse-cd4-antibody-33857GroupD-BLG4745                                                                      |
| CD4            | Bright Violet 605 | Mouse       | RM-5        | BD Biosciences          | 100548      | 1:100         | https://www.bdbiosciences.com/en-us/products/bright-violet-605-anti-mouse-cd4-antibody-7627GroupD-BLG4745                                                          |
| CD4            | Bright Violet 711 | Mouse       | RM-5        | BD Biosciences          | 100552      | 1:100         | https://www.bdbiosciences.com/en-us/products/bright-violet-711-anti-mouse-cd4-antibody-78257GroupD-BLG4211                                                         |
| CD4            | PE                | Human/Mouse | RM-5        | BD Biosciences          | 100512      | 1:100         | https://www.bdbiosciences.com/en-us/products/pe-anti-mouse-cd4-antibody-482                                                                                        |
| CD44           | Alexa Fluor 488   | Human/Mouse | IM7         | BD Biosciences          | 103016      | 1:100         | https://www.bdbiosciences.com/en-us/products/alexa-fluor-488-anti-mouse-human-cd44-antibody-30977GroupD-BLG10248                                                   |
| CD44           | APC               | Human/Mouse | IM7         | BD Biosciences          | 103016      | 1:100         | https://www.bdbiosciences.com/en-us/products/apc-anti-mouse-human-cd44-antibody-312                                                                                |
| CD44           | PerCP-Cy5.5       | Mouse       | IM7         | BD Biosciences          | 103032      | 1:100         | https://www.bdbiosciences.com/en-us/products/percp-cy5-5-anti-mouse-cd44-antibody-56057GroupD-BLG10248                                                             |
| CD45           | APC               | Mouse       | 30-F11      | eBioscience             | 17-0451-82  | 1:100         | https://www.thermofisher.com/antibody/product/CD45-Antibody-clone-30-F11-Monoclonal-17-0451-82                                                                     |
| CD45           | APC               | Mouse       | 30-F11      | eBioscience             | 103112      | 1:100         | https://www.bdbiosciences.com/en-us/products/apc-anti-mouse-cd45-antibody-97                                                                                       |
| CD45           | Bright Violet 510 | Mouse       | 30-F11      | BD Biosciences          | 103138      | 1:400         | https://www.bdbiosciences.com/en-us/products/bright-violet-510-anti-mouse-cd45-antibody-7395                                                                       |
| CD45           | Pacific Blue      | Mouse       | 30-F11      | BD Biosciences          | 103126      | 1:100         | https://www.bdbiosciences.com/en-us/products/pacific-blue-anti-mouse-cd45-antibody-31027GroupD-BLG6841                                                             |
| CD45           | PE                | Mouse       | 30-F11      | BD Biosciences          | 103106      | 1:100         | https://www.bdbiosciences.com/en-us/products/pe-anti-mouse-cd45-antibody-100                                                                                       |
| CD45-1         | FITC              | Mouse       | A20         | Invitrogen              | 11-0453-82  | 1:100         | https://www.thermofisher.com/antibody/product/CD45-1-Antibody-clone-A20-Monoclonal-11-0453-82                                                                      |
| CD45-1         | PE                | Mouse       | A20         | Invitrogen              | 12-0453-82  | 1:100         | https://www.thermofisher.com/antibody/product/CD45-1-Antibody-clone-A20-Monoclonal-12-0453-82                                                                      |
| CD45-1         | PE-Cy7            | Mouse       | 104         | BD Biosciences          | 110730      | 1:100         | https://www.bdbiosciences.com/en-us/products/pe-cy7-anti-mouse-cd45-1-antibody-45177GroupD-BLG1933                                                                 |
| CD45-2         | APC               | Mouse       | 104         | eBioscience             | 17-0454-82  | 1:100         | https://www.thermofisher.com/antibody/product/CD45-2-Antibody-clone-104-Monoclonal-17-0454-82                                                                      |
| CD45-2         | APC-Cy7           | Mouse       | 104         | BD Biosciences          | 100624      | 1:100         | https://www.bdbiosciences.com/en-us/products/apc-cy7-anti-mouse-cd45-2-antibody-3906                                                                               |
| CD45-2         | APC-F470          | Mouse       | 104         | eBioscience             | 47-0454-82  | 1:100         | https://www.thermofisher.com/antibody/product/CD45-2-Antibody-clone-104-Monoclonal-47-0454-82                                                                      |
| CD45-2         | Pacific Blue      | Mouse       | 104         | eBioscience             | 100620      | 1:100         | https://www.bdbiosciences.com/en-us/products/pacific-blue-anti-mouse-cd45-2-antibody-31087GroupD-BLG1934                                                           |
| CD45-2         | PE                | Mouse       | 104         | Invitrogen              | 12-0454-82  | 1:100         | https://www.thermofisher.com/antibody/product/CD45-2-Antibody-clone-104-Monoclonal-12-0454-82                                                                      |
| CD45R          | Bright Violet 605 | Human       | R43482      | BD Biosciences          | 612344      | 1:150         | https://www.bdbiosciences.com/en-us/products/bright-violet-605-anti-human-cd45r-antibody-7870GroupD-GROUP20                                                        |
| CD45RA         | BV173             | Human       | H1100       | BD Biosciences          | 612846      | 1:400         | https://www.bdbiosciences.com/en-us/products/bv173-anti-human-cd45ra-antibody-research-reagents/single-color-antibodies-ruo/bv737-mouse-anti-human-cd45ra-612846   |
| CD62L          | Alexa Fluor 488   | Human       | MEL-14      | BD Biosciences          | 104420      | 1:100         | https://www.bdbiosciences.com/en-us/products/alexa-fluor-488-anti-human-cd62l-antibody-31157GroupD-GROUP20                                                         |
| CD62L          | PE                | Human       | MEL-14      | BD Biosciences          | 104418      | 1:100         | https://www.bdbiosciences.com/en-us/products/pe-anti-human-cd62l-antibody-19227GroupD-BLG10870                                                                     |
| CD62L          | PE-Dazzle594      | Mouse       | MEL-14      | BD Biosciences          | 104446      | 1:200         | https://www.bdbiosciences.com/en-us/products/pe-dazzle-594-anti-mouse-cd62l-antibody-12137                                                                         |
| CD66           | Bright Violet 711 | Human       | X54-577     | BD Biosciences          | 139311      | 1:100         | https://www.bdbiosciences.com/en-us/products/bright-violet-711-anti-human-cd66-antibody-99207GroupD-BLG8805                                                        |
| CD66           | FITC              | Human       | GL105       | BD Biosciences          | 305103      | 1:400         | https://www.bdbiosciences.com/en-us/products/fic-anti-human-cd66-antibody-666                                                                                      |
| CD66           | PE                | Human       | GL105       | BD Biosciences          | 305103      | 1:400         | https://www.bdbiosciences.com/en-us/products/pe-anti-human-cd66-antibody-6529                                                                                      |
| CD68           | APC-Cy7           | Mouse       | GL-1        | BD Biosciences          | 553030      | 1:100         | https://www.bdbiosciences.com/en-us/products/apc-cy7-anti-mouse-cd68-antibody-65547GroupD-BLG11928                                                                 |
| CD68           | Pacific Blue      | Human       | T12.2       | BD Biosciences          | 306417      | 1:100         | https://www.bdbiosciences.com/en-us/products/pacific-blue-anti-human-cd68-antibody-3387                                                                            |
| CD68           | PE                | Human       | GL-1        | BD Biosciences          | 100922      | 1:100         | https://www.bdbiosciences.com/en-us/products/pe-anti-human-cd68-antibody-3122                                                                                      |
| CD68           | PerCP-Cy5.5       | Mouse       | 53-6.7      | BD Biosciences          | 100734      | 1:400         | https://www.bdbiosciences.com/en-us/products/percp-cy5-5-anti-mouse-cd68-antibody-4255                                                                             |
| CD68           | Alexa Fluor 700   | Mouse       | 53-6.7      | eBioscience             | 56-0081-82  | 1:100         | https://www.thermofisher.com/antibody/product/CD68-Antibody-clone-53-6.7-Monoclonal-56-0081-82                                                                     |
| CD68           | APC               | Mouse       | 53-6.7      | BD Biosciences          | 100774      | 1:100         | https://www.bdbiosciences.com/en-us/products/apc-anti-mouse-cd68-antibody-2089                                                                                     |
| CD68           | Bright Violet 605 | Mouse       | 53-6.7      | BD Biosciences          | 100744      | 1:100         | https://www.bdbiosciences.com/en-us/products/bright-violet-605-anti-mouse-cd68-antibody-7636                                                                       |
| CD68           | PE                | Mouse       | 53-6.7      | BD Biosciences          | 100752      | 1:100         | https://www.bdbiosciences.com/en-us/products/pe-anti-mouse-cd68-antibody-7992                                                                                      |
| CD68           | PE                | Mouse       | 53-6.7      | Invitrogen              | 553030      | 1:100         | https://www.bdbiosciences.com/en-us/products/pe-anti-mouse-cd68-antibody-reagents/research-reagents/single-color-antibodies-ruo/rat-anti-mouse-cd68-553030         |
| CD68           | PerCP-Cy5.5       | Human       | SMB         | BD Biosciences          | 353803      | 1:400         | https://www.bdbiosciences.com/en-us/products/percp-cy5-5-anti-human-cd68-antibody-6389                                                                             |
| CD68           | Alexa Fluor 488   | Human       | BFB         | BD Biosciences          | 353808      | 1:200         | https://www.bdbiosciences.com/en-us/products/alexa-fluor-488-anti-human-cd68-antibody-6389                                                                         |
| CD68           | APC               | Mouse       | BMB         | BD Biosciences          | 123120      | 1:100         | https://www.bdbiosciences.com/en-us/products/apc-anti-mouse-cd68-antibody-4073                                                                                     |
| CD68           | PE                | Mouse       | BMB         | BD Biosciences          | 123116      | 1:100         | https://www.bdbiosciences.com/en-us/products/pe-anti-mouse-cd68-antibody-4071                                                                                      |
| CD68           | PE-Cy7            | Mouse       | BMB         | BD Biosciences          | 123118      | 1:100         | https://www.bdbiosciences.com/en-us/products/pe-cy7-anti-mouse-cd68-antibody-4072                                                                                  |
| CD68           | PE-Cy7            | Mouse       | BMB         | BD Biosciences          | 123114      | 1:200         | https://www.bdbiosciences.com/en-us/products/pe-cy7-anti-mouse-cd68-antibody-4070GroupD-BLG5319                                                                    |
| Granzyme B     | PE-Teas Red       | Human/Mouse | GB11        | ThermoFisher Scientific | GRB17       | 1:100         | https://www.thermofisher.com/antibody/product/Granzyme-B-Antibody-clone-GB11-Monoclonal-GRB17                                                                      |
| G2D            | APC               | Human/Mouse | APC         | BD Biosciences          | 561209      | 1:100         | https://www.bdbiosciences.com/en-us/products/apc-anti-human-granzyme-b-antibody-298                                                                                |
| HLA-ABC        | PerCP-Cy5.5       | Human       | WB62        | BD Biosciences          | 311419      | 1:400         | https://www.bdbiosciences.com/en-us/products/percp-cy5-5-anti-human-hla-a-b-c-antibody-7057                                                                        |
| HLA-A2         | PE-Cy7            | Human       | B87.2       | BD Biosciences          | 343313      | 1:100         | https://www.bdbiosciences.com/en-us/products/pe-cy7-anti-human-hla-a2-antibody-3184                                                                                |
| HLA-DR         | Pacific Blue      | Human       | L243        | BD Biosciences          | 301763      | 1:200         | https://www.bdbiosciences.com/en-us/products/pacific-blue-anti-human-hla-dr-antibody-4246                                                                          |
| IFN-γ          | APC               | Mouse       | XMG.12      | BD Biosciences          | 562018      | 1:100         | https://www.bdbiosciences.com/en-us/products/apc-anti-mouse-ifn-gamma-antibody-research-reagents/single-color-antibodies-ru                                        |
