# Supplementary material for: Cytokine-armed dendritic cell progenitors for antigen-agnostic cancer immunotherapy
Source: PubMed Central journal article supplement (PMC10899110; doi:10.1038/s43018-023-00668-y), 2023-11-23
Supplement: 43018_2023_668_MOESM2_ESM.pdf [file 43018_2023_668_MOESM2_ESM.pdf]

## Reporting Summary

Nature Portfolio wishes to improve the reproducibility of the work that we publish. This form provides structure for consistency and transparency in reporting. For further information on Nature Portfolio policies, see our [Editorial Policies](#) and the [Editorial Policy Checklist](#).

### Statistics

For all statistical analyses, confirm that the following items are present in the figure legend, table legend, main text, or Methods section.

n/a Confirmed

- The exact sample size ( $n$ ) for each experimental group/condition, given as a discrete number and unit of measurement
- A statement on whether measurements were taken from distinct samples or whether the same sample was measured repeatedly
- The statistical test(s) used AND whether they are one- or two-sided  
*Only common tests should be described solely by name; describe more complex techniques in the Methods section.*
- A description of all covariates tested
- A description of any assumptions or corrections, such as tests of normality and adjustment for multiple comparisons
- A full description of the statistical parameters including central tendency (e.g. means) or other basic estimates (e.g. regression coefficient) AND variation (e.g. standard deviation) or associated estimates of uncertainty (e.g. confidence intervals)
- For null hypothesis testing, the test statistic (e.g.  $F$ ,  $t$ ,  $r$ ) with confidence intervals, effect sizes, degrees of freedom and  $P$  value noted  
*Give  $P$  values as exact values whenever suitable.*
- For Bayesian analysis, information on the choice of priors and Markov chain Monte Carlo settings
- For hierarchical and complex designs, identification of the appropriate level for tests and full reporting of outcomes
- Estimates of effect sizes (e.g. Cohen's  $d$ , Pearson's  $r$ ), indicating how they were calculated

*Our web collection on [statistics for biologists](#) contains articles on many of the points above.*

### Software and code

Policy information about [availability of computer code](#)

#### Data collection

Flow cytometry data were acquired using BD LSRFortessa™ (Becton Dickinson); BD® LSR II SORP (Becton Dickinson); and Attune™ NxT (Invitrogen).

Acquisition of immunofluorescence staining images from tissue sections used a Axioscan microscope (Zeiss).

Luciferase radiance from liver tumors and intracranial gliomas was acquired using an IVIS apparatus (PerkinElmer).

Single cell RNA sequencing used an Illumina HiSeq 4000 paired-end Flow Cell instrument (Illumina).

TCR sequencing used an Illumina MiSeq instrument (Illumina).

#### Data analysis

Graphs were generated and statistical analyses performed with Prism (GraphPad Software). Error bars indicate the standard error of the mean (SEM), unless indicated otherwise. The number of biological (non-technical) replicates and applied statistical analysis are indicated in the figure legends. Briefly, comparison between two unpaired groups was performed by non-parametric Mann-Whitney test. For multiple comparisons involving one variable, one-way ANOVA was performed followed by Tukey's multiple comparison test, unless otherwise stated in the figure legends. Simultaneous analysis of two variables (tumor growth over time) among multiple groups was performed by two-way ANOVA followed by Tukey's (three groups or more) or Sidak's (two groups) multiple comparison test. Other statistical tests were applied in selected cases, as detailed in the figure legends.

Flow cytometry analysis used FlowJo, LLC V10.1. Gating strategies are reported in the section "Flow Cytometry" below.

To analyze immunofluorescent images, we used the Qupath 77 software. A region of interest (ROI) of the tumor was defined by setting a DAPI threshold and adjusted manually to include DAPI-negative necrotic areas and exclude adjacent tissue. For quantification of CD31+ and F4/80+ area, a CD31+ or F4/80+ pixel classifier trained on 10% of the dataset was applied. The area of each marker was normalized to the total tumor area. For quantification of CD3+, CD3+CD8+, CD4+, and NKp46+ cells, nuclei segmentation was performed using StarDist and “dsb2018\_heavy\_augment.pb” model on the DAPI channel. A CD3+, CD8+, CD4+, or NKp46+ cell composite classifier trained on 15% of the dataset was applied.

IVIS imaging used IVIS software (v4.7.3; PerkinElmer)

RNA-seq analysis used Cell Ranger (v 7.0) and Seurat (4.1.1) to map reads on mouse genome in single cell RNA sequencing datasets, and ClusterProfiler (4.4.1) for gene pathway analysis.

TCR analysis was performed by using the Immunarch library in R (4.2.1).

For manuscripts utilizing custom algorithms or software that are central to the research but not yet described in published literature, software must be made available to editors and reviewers. We strongly encourage code deposition in a community repository (e.g. GitHub). See the Nature Portfolio [guidelines for submitting code & software](#) for further information.

## Data

Policy information about [availability of data](#)

All manuscripts must include a [data availability statement](#). This statement should provide the following information, where applicable:

- Accession codes, unique identifiers, or web links for publicly available datasets
- A description of any restrictions on data availability
- For clinical datasets or third party data, please ensure that the statement adheres to our [policy](#)

All raw data supporting the findings of this study are presented as Source Data.

ScRNA-seq data have been deposited in GEO with GEO accession GSE228014.

TCR-Seq data have been deposited in GEO with GEO accession GSE228161.

## Human research participants

Policy information about [studies involving human research participants and Sex and Gender in Research](#).

Reporting on sex and gender

Information on sex and gender was not considered in the study design and analysis.

Population characteristics

Population characteristics were not considered in the study design and analysis.

Recruitment

CD34+ cells from cord blood (CB) and mobilized peripheral blood (MPB) were purchased from Stem Cell Technologies (CB) and Lonza (CB and MPB). Peripheral blood from healthy donors was obtained from the Blood Transfusion Center (Lausanne, Switzerland) under protocol P\_297.

Ethics oversight

The use of primary blood cells did not require approval from an Ethics Committee.

Note that full information on the approval of the study protocol must also be provided in the manuscript.

## Field-specific reporting

Please select the one below that is the best fit for your research. If you are not sure, read the appropriate sections before making your selection.

Life sciences       Behavioural & social sciences       Ecological, evolutionary & environmental sciences

For a reference copy of the document with all sections, see [nature.com/documents/nr-reporting-summary-flat.pdf](https://nature.com/documents/nr-reporting-summary-flat.pdf)

## Life sciences study design

All studies must disclose on these points even when the disclosure is negative.

Sample size

Studies involving independent cohorts of mice were typically performed once, with the several exceptions stated in the figure legends. Each study was designed to use the minimum number of mice required to obtain informative results (i.e., quantitative data suited to statistical analysis) and sufficient material for further studies. No specific statistical tests were used to predetermine the sample size; our previous experience with the different tumor models provided guidance about the adequate number of mice that would provide statistically significant results. Based on these considerations, we typically employed experimental cohorts of 5-10 mice.

Experiments involving human primary cells (Fig. 8) used several independent donors (5 for MPB; 7 for CB) for initial experiments aimed to characterize the key properties of the DCPs (expansion and yield: Fig. 8C-D). For these studies, we employed relatively high numbers of

donors (5-7) to verify reproducibility of the key results across independent donors. Additional studies shown in Fig. 8F-I were aimed to evaluate qualitative differences between moDCs and DCPs and, therefore, only used 1-3 independent donors; statistical analyses were not performed on these samples.

|                 |                                                                                                                                                                                                                                                                                                                                                                                                                                                                                                                                                                                                                                                                                                                                                                                                                                                                                                                                                                 |
|-----------------|-----------------------------------------------------------------------------------------------------------------------------------------------------------------------------------------------------------------------------------------------------------------------------------------------------------------------------------------------------------------------------------------------------------------------------------------------------------------------------------------------------------------------------------------------------------------------------------------------------------------------------------------------------------------------------------------------------------------------------------------------------------------------------------------------------------------------------------------------------------------------------------------------------------------------------------------------------------------|
| Data exclusions | Outliers were never excluded from analysis. In rare cases, selected samples were lost and excluded from specific analyses because of technical flaws during sample collection, processing or data acquisition. Exclusion criteria were not pre-established.                                                                                                                                                                                                                                                                                                                                                                                                                                                                                                                                                                                                                                                                                                     |
| Replication     | Biological replicates in each experiment are defined in the figure legends. Studies involving mice were typically performed once to limit the use of animals, with the exception of control groups or standard treatments (e.g., DCP treatment), which were replicated in independent experiments. Cell culture experiments (Fig. 8) were performed 5-7 times for obtaining the key results and 1-3 times for additional qualitative data.                                                                                                                                                                                                                                                                                                                                                                                                                                                                                                                      |
| Randomization   | Tumor-bearing mice were randomized before treatment by allocating mice bearing tumors ranked by volume to alternate treatment groups. Certain mice were excluded at the time of randomization, for example, if the tumors were not detectable or were significantly larger than the average tumor volume. We further verified that the mean tumor volume before treatment was comparable in the different experimental groups, when applicable.                                                                                                                                                                                                                                                                                                                                                                                                                                                                                                                 |
| Blinding        | Blinding in mouse studies was not possible due to tagging of the mice and access to identification codes by the investigators. Although data acquisition was blinded in most cases (samples were labeled with identification codes that do not indicate the treatment/experimental group), the investigators had access to the identity of the samples through the identification codes. In most applications, acquisition of the data was performed by expert technical staff with knowledge of the identity of the experimental groups but without knowledge of the expected treatment effects. The investigators were blinded when collecting most data (tumor growth; acquisition and software-based quantification of immunofluorescence staining datasets; acquisition of flow cytometry data), but were not blinded when analyzing flow cytometry data (owing to manual processing of the data and access to identification codes by the investigators). |

## Reporting for specific materials, systems and methods

We require information from authors about some types of materials, experimental systems and methods used in many studies. Here, indicate whether each material, system or method listed is relevant to your study. If you are not sure if a list item applies to your research, read the appropriate section before selecting a response.

### Materials & experimental systems

### Methods

- | n/a                                 | Involved in the study                                           |
|-------------------------------------|-----------------------------------------------------------------|
| <input type="checkbox"/>            | <input checked="" type="checkbox"/> Antibodies                  |
| <input type="checkbox"/>            | <input checked="" type="checkbox"/> Eukaryotic cell lines       |
| <input checked="" type="checkbox"/> | <input type="checkbox"/> Palaeontology and archaeology          |
| <input type="checkbox"/>            | <input checked="" type="checkbox"/> Animals and other organisms |
| <input checked="" type="checkbox"/> | <input type="checkbox"/> Clinical data                          |
| <input checked="" type="checkbox"/> | <input type="checkbox"/> Dual use research of concern           |

- | n/a                                 | Involved in the study                              |
|-------------------------------------|----------------------------------------------------|
| <input checked="" type="checkbox"/> | <input type="checkbox"/> ChIP-seq                  |
| <input type="checkbox"/>            | <input checked="" type="checkbox"/> Flow cytometry |
| <input checked="" type="checkbox"/> | <input type="checkbox"/> MRI-based neuroimaging    |

## Antibodies

### Antibodies used

A list of antibodies is provided. We indicate the following: Antigen; Fluorochrome; Reactivity; Clone; Provider; Reference (catalogue #); Dilution.

#### FLOW CYTOMETRY

Antigen - Fluorochrome - Reactivity - Clone - Provider - Reference - Dilution  
 BDCA2/CD303 Brilliant Violet 605 Human 201A BioLegend 354223 1:100  
 BDCA3/CD141 PE-Cy7 Human M80 BioLegend 344109 1:400  
 BDCA1/CD1c Brilliant Violet 785 Human L161 BioLegend 331543 1:100  
 CD10 FITC Human HI10a BioLegend 982204 1:100  
 CD103 Brilliant Violet 605 Mouse 2E7 BioLegend 121433 1:100  
 CD103 Brilliant Violet 711 Mouse 2E7 BioLegend 121435 1:100  
 CD103 FITC Mouse 2E7 BioLegend 121420 1:200  
 CD103 PE Mouse 2E7 BioLegend 121406 1:100  
 CD115 APC Mouse AFS98 ThermoFisher Scientific 17-1152-80 1:100  
 CD115 APC Human 9-4D2-1E4 BioLegend 347305 1:50  
 CD117 Brilliant Violet 421 Human 104D2 BioLegend 313215 1:50  
 CD11b Brilliant Violet 510 Mouse M1/70 BioLegend 101263 1:100  
 CD11b Brilliant Violet 650 Human/Mouse M1/70 BioLegend 101239 1:400  
 CD11b Brilliant Violet 711 Human/Mouse M1/70 BioLegend 101241 1:200  
 CD11b PE-Cy7 Human M1/70 eBioscience 25-0112-82 1:400  
 CD11c APC Mouse N418 BioLegend 117309 1:200  
 CD11c APC-Cy7 Mouse N418 BioLegend 117324 1:100  
 CD11c Brilliant Violet 421 Mouse N418 BioLegend 117330 1:100  
 CD11c Brilliant Violet 650 Mouse N418 BioLegend 117339 1:100  
 CD11c Brilliant Violet 650 Human 3.9 BioLegend 301637 1:50

CD11c PE-Dazzle594 Human 3.9 BioLegend 301641 1:100  
 CD116 BUV615 Human hGMCSFR-M1 BD Biosciences 751535 1:200  
 CD123 Brilliant Violet 510 Human 6H6 BioLegend 306021 1:200  
 CD135 PE Human 4G8 BD Biosciences 558996 1:50  
 CD14 APC-Cy7 Human M5E2 BioLegend 301819 1:100  
 CD14 APC-eF750 Human Tuk4 ThermoFisher Scientific MHCD1427 1:400  
 CD19 AF700 Human SJ25C1 Invitrogen " 56019842" 1:50  
 CD19 BUV395 Human SJ25-C1 BD Biosciences 563551 1:50  
 CD271/LNGFR APC Human ME20.4-1.H4 MACS 130-113-418 1:200  
 CD271/LNGFR AF700 Human ME20.4 BioLegend 345117 1:100  
 CD271/LNGFR FITC Human ME20.4-1.H4 MACS 130-113-420 1:200  
 CD279 Brilliant Violet 510 Mouse 29F 1A12 BioLegend 135241 1:100  
 CD279 PE Mouse RMP1-30 BioLegend 109104 1:100  
 CD279 PE-Cy7 Mouse J43 Invitrogen 25-9985-82 1:100  
 CD3 APC Mouse 17A2 BioLegend 100236 1:100  
 CD3 Brilliant Violet 605 Mouse 17A2 BioLegend 100237 1:100  
 CD3 Brilliant Violet 650 Mouse 17A2 BioLegend 100229 1:100  
 CD3 FITC Mouse 17A2 BioLegend 100204 1:100  
 CD3 Brilliant Violet 605 Human OKT3 BioLegend 317321 1:100  
 CD3 AF700 Human HIT3a BioLegend 300323 1:400  
 CD3 PE Human SK7 BioLegend 344805 1:100  
 CD3 APC-eF780 Human SK7 eBioscience 47-0036-41 1:100  
 CD3 BUV395 Human UCHT1 BD Biosciences 563548 1:50  
 CD335 FITC Human 9E2 BioLegend 331922 1:200  
 CD335 PE Human 9E2 BioLegend 331907 1:100  
 CD34 PE-Dazzle594 Human 581 BioLegend 343533 1:100  
 CD366 Brilliant Violet 711 Mouse RMT3-23 BioLegend 119727 1:100  
 CD4 AF700 Mouse RM4-5 BioLegend 100536 1:400  
 CD4 Alexa Fluor 647 Mouse RM4-5 BioLegend 100530 1:100  
 CD4 AF700 Mouse GK1.5 BioLegend 100430 1:100  
 CD4 Brilliant Violet 605 Mouse RM4-5 BioLegend 100548 1:100  
 CD4 Brilliant Violet 711 Mouse RM4-5 BioLegend 100550 1:100  
 CD4 PE Human/Mouse RM4-5 BioLegend 100512 1:100  
 CD44 Alexa Fluor 488 Human/Mouse IM7 BioLegend 103016 1:100  
 CD44 APC Human/Mouse IM7 BioLegend 103012 1:200  
 CD44 PerCP-Cy 5.5 Mouse IM7 BioLegend 103032 1:100  
 CD45 APC Mouse 30-F11 eBioscience 17-0451-82 1:100  
 CD45 APC Mouse 30-F11 BioLegend 103112 1:100  
 CD45 Brilliant Violet 510 Mouse 30-F11 BioLegend 103138 1:400  
 CD45 Pacific Blue Mouse 30-F11 BioLegend 103126 1:100  
 CD45 PE Mouse 30-F11 BioLegend 103106 1:100  
 CD45.1 FITC Mouse A20 Invitrogen 11-0453-82 1:100  
 CD45.1 PE Mouse A20 Invitrogen 12-0453-82 1:100  
 CD45.1 PE-Cy7 Mouse 104 BioLegend 110730 1:100  
 CD45.2 APC Mouse 104 eBioscience 17-0454-82 1:100  
 CD45.2 APC-Cy7 Mouse 104 BioLegend 109824 1:100  
 CD45.2 " APC-eFluor 780" Mouse 104 eBioscience 47-0454-82 1:100  
 CD45.2 Pacific Blue Mouse 104 eBioscience 109820 1:100  
 CD45.2 PE Mouse 104 Invitrogen 12-0454-82 1:100  
 CD45R Brilliant Violet 605 Mouse RA3-6B2 BioLegend 103244 1:100  
 CD45RA BUV737 Human HI100 BD Biosciences 612846 1:400  
 CD62L Alexa Fluor 488 Mouse MEL-14 BioLegend " 104420" 1:100  
 CD62L PE-Cy7 Mouse MEL-14 BioLegend 104418 1:100  
 CD62L PE/Dazzle Mouse MEL-14 BioLegend 104448 1:200  
 CD64 Brilliant Violet 711 Mouse X54-5/7.1 BioLegend 139311 1:100  
 CD66b FITC Human G10F5 BioLegend 305103 1:400  
 CD66b PE Human G10F5 BioLegend 305106 1:400  
 CD86 APC-Cy7 Mouse GL-1 BioLegend 553030 1:100  
 CD86 Pacific Blue Human IT2.2 BioLegend 305417 1:100  
 CD86 Pacific Blue Mouse GL-1 BioLegend 105022 1:100  
 CD8a PerCp-Cy5.5 Mouse 53-6.7 BioLegend 100734 1:400  
 CD8a Alexa Fluor 700 Mouse 53-6.7 eBioscience 56-0081-82 1:100  
 CD8a APC-Cy7 Mouse 53-6.7 BioLegend 100714 1:100  
 CD8a Brilliant Violet 605 Mouse 53-6.7 BioLegend 100744 1:100  
 CD8a Brilliant Violet 510 Mouse 53-6.7 BioLegend 100752 1:100  
 CD8a FITC Mouse 53-6.7 Invitrogen 553030 1:100  
 CD8a PE Mouse 53-6.7 Invitrogen 12-0081-82 1:100  
 CD8a PerCP-Cy 5.5 Human SK1 BioLegend 353803 1:400  
 CLEC9A APC Human 8F9 BioLegend 353806 1:200  
 F4/80 Alexa Fluor 488 Mouse BM8 BioLegend 123120 1:100  
 F4/80 APC Mouse BM8 BioLegend 123116 1:100  
 F4/80 APC-Cy7 Mouse BM8 BioLegend 123118 1:100  
 F4/80 PE-Cy7 Mouse BM8 BioLegend 123114 1:200  
 Granzyme B PE-Texas Red Human/Mouse GB11 ThermoFisher Scientific GRB17 1:100  
 GD2 APC Mouse/Human 14G2A BioLegend 357305 1:100  
 HLA-A/B/C PerCp-Cy5.5 Human W6/32 BioLegend 311419 1:400

HLA-A2 PE-Cy7 Human BB7.2 BioLegend 343313 1:100  
 HLA-DR PerCp-Cy5.5 Human L243 BioLegend 307629 1:200  
 IFN- $\gamma$  APC Mouse XMG1.2 BD Biosciences 562018 1:100  
 IFN- $\gamma$  APC Mouse XMG1.2 BioLegend 505810 1:200  
 IFN- $\gamma$  PE-Cy7 Human 4S.B3 BD Biosciences 561036 1:200  
 ISO PE-Cy7 Human MPC-11 BioLegend 400325 1:50  
 ISO PerCp-Cy5.5 Human MOPC-173 BioLegend 400257 1:800  
 Ly6C Alexa Fluor 700 Mouse HK1.4 BioLegend 128024 1:100  
 Ly6C Brilliant Violet 605 Mouse HK1.4 BioLegend 128035 1:100  
 Ly6C Brilliant Violet 711 Mouse HK1.4 BioLegend 128037 1:100  
 Ly6C Brilliant Violet 650 Mouse HK1.4 BioLegend 128049 1:200  
 Ly6G Brilliant Violet 605 Mouse 1A8 BioLegend " 127639" 1:100  
 Ly6G Pacific Blue Mouse 1A8 BioLegend 127611 1:100  
 MHC class II APC-Cy7 Mouse M5/114.15.2 BioLegend 107628 1:100  
 MHC class II FITC Mouse M5/114.15.2 Invitrogen 11-5321-85 1:100  
 MHC class II Pacific Blue Mouse M5/114.15.2 BioLegend 107620 1:100  
 MHC class II PE Mouse M5/114.15.2 ThermoFisher Scientific A14763 1:100  
 MHC class II Pe-Cy5 Mouse M5/114.15.2 BioLegend 107612 1:100  
 MHC class II Pe-Cy7 Mouse M5/114.15.2 BioLegend 107629 1:100  
 MHC class II PerCP-Cy 5.5 Mouse M5/114.15.2 BioLegend 107625 1:200  
 NK 1.1 AF488 Mouse PK136 BioLegend 108706 1:200  
 NK 1.1 Brilliant Violet 711 Mouse PK136 BioLegend 108745 1:200  
 NK1.1 PE-Cy7 Mouse PK136 BioLegend 108714 1:100  
 TCR $\beta$  Brilliant Violet 650 Mouse H57-597 BioLegend 109251 1:400  
 TIM-3 Brilliant Violet 711 Mouse RMT3-23 BioLegend 119727 1:100  
 TNF $\alpha$  A700 Mouse MAb11 BD Biosciences 561023 1:100  
 TNF $\alpha$  PE-Cy7 Mouse MP6-XT22 BioLegend 506324 1:100  
 TNF $\alpha$  PE/Dazzle Human MAb11 BD Biosciences 561023 1:100  
 XCR1 Brilliant Violet 510 Mouse/Rat ZET BioLegend 148218 1:100  
 XCR1 PE Mouse ZET BioLegend 148204 1:200  
 $\beta$ 2-microglobulin PE Mouse A16041A BioLegend 154503 1:100

#### IMMUNOFLUORESCENCE STAINING

Antigen - (Fluorochrome) - Reactivity - Clone - Provider - Reference - Dilution

F4/80 PE Mouse BM8 BioLegend 123109 1:50  
 CD8a APC Mouse 53-6.7 BD Bioscience 561093 1:50  
 CD8b APC Mouse YTS156.7.7 BioLegend 126613 1:50  
 CD3e PE Mouse OKT3 BioLegend 317308 1:100  
 CD3 PE Mouse 500A2 BD Bioscience 553240 1:50  
 NKp46 PE Mouse 29A1.4 BioLegend 137603 1:50

GFP Unconj. GFP polyclonal Proteintech 50430-2-AP 1:200  
 CD31 Unconj. Mouse polyclonal LifeSpan Biosciences LS-C150165 1:300  
 Secondary (for GFP) AF488 Rabbit polyclonal ThermoFisher A-21206 1:500  
 Secondary (for CD31) AF488 Goat polyclonal ThermoFisher A-11055 1:500

CD8a Unconj. Mouse H2(20) Cell signaling 98941S 1:400  
 CD4 Unconj. Mouse 14-9766 eBioscience 14-9766 1:1000  
 Secondary (for CD8a) HRP\* Rabbit polyclonal Agilent DAKO P044801-2 1:300  
 Secondary (for CD4) HRP\*\* Rat polyclonal Jackson Immuno Research 312-005-045 1:1000

#### Validation

Only commercially available and routinely used antibodies have been used in this study. All antibodies were validated by the provider, as indicated in the references provided by the manufacturer.

BDCA2/CD303 Brilliant Violet 605 Human 201A BioLegend 354223 1:100 <https://www.biolegend.com/en-us/products/brilliant-violet-605-anti-human-cd303-bdca-2-antibody-13062>

BDCA3/CD141 PE-Cy7 Human M80 BioLegend 344109 1:400 <https://www.biolegend.com/en-us/products/pe-cyanine7-anti-human-cd141-thrombomodulin-antibody-8221>

BBDA1/CD1c Brilliant Violet 785 Human L161 BioLegend 331543 1:100 <https://www.biolegend.com/en-us/products/brilliant-violet-785-anti-human-cd1c-antibody-17375>

CD10 FITC Human HI10a BioLegend 982204 1:100 <https://www.biolegend.com/en-us/products/fic-anti-human-cd10-antibody-14046>

CD103 Brilliant Violet 605 Mouse 2E7 BioLegend 121433 1:100 <https://www.biolegend.com/ja-jp/products/brilliant-violet-605-anti-mouse-cd103-antibody-13558>

CD103 Brilliant Violet 711 Mouse 2E7 BioLegend 121435 1:100 <https://www.biolegend.com/en-us/products/brilliant-violet-711-anti-mouse-cd103-antibody-14411?GroupID=BLG4646>

CD103 FITC Mouse 2E7 BioLegend 121420 1:200 <https://www.biolegend.com/en-ie/products/fic-anti-mouse-cd103-antibody-7053?GroupID=GROUP20>

CD103 PE Mouse 2E7 BioLegend 121406 1:100 <https://www.biolegend.com/en-us/products/pe-anti-mouse-cd103-antibody-3574?GroupID=GROUP20>

CD115 APC Mouse AFS98 ThermoFisher Scientific 17-1152-80 1:100 <https://www.thermofisher.com/antibody/product/CD115-c-fms-Antibody-clone-AFS98-Monoclonal/17-1152-82>

CD115 APC Human 9-4D2-1E4 BioLegend 347305 1:50 <https://www.biolegend.com/en-us/products/apc-anti-human-cd115-csf-1r-antibody-8783>

CD117 Brilliant Violet 421 Human 104D2 BioLegend 313215 1:50 <https://www.biolegend.com/en-us/products/brilliant-violet-421-anti-human-cd117-c-kit-antibody-7348>

CD11b Brilliant Violet 510 Mouse M1/70 BioLegend 101263 1:100 <https://www.biolegend.com/en-us/products/brilliant-violet-510-anti-mouse-human-cd11b-antibody-7993>

CD11b Brilliant Violet 650 Human/Mouse M1/70 BioLegend 101239 1:400 <https://www.biolegend.com/en-us/products/brilliant-violet-650-anti-mouse-human-cd11b-antibody-7638>

CD11b Brilliant Violet 711 Human/Mouse M1/70 BioLegend 101241 1:200 <https://www.biolegend.com/en-us/products/brilliant-violet-711-anti-mouse-human-cd11b-antibody-7927>

CD11b PE-Cy7 Human M1/70 eBioscience 25-0112-82 1:400 <https://www.thermofisher.com/antibody/product/CD11b-Antibody-clone-M1-70-Monoclonal/25-0112-82>

CD11c APC Mouse N418 BioLegend 117309 1:200 <https://www.biolegend.com/de-at/products/apc-anti-mouse-cd11c-antibody-1813>

CD11c APC-Cy7 Mouse N418 BioLegend 117324 1:100 <https://www.biolegend.com/fr-ch/products/apc-cyanine7-anti-mouse-cd11c-antibody-3931?GroupID=BLG11937>

CD11c Brilliant Violet 421 Mouse N418 BioLegend 117330 1:100 <https://www.biolegend.com/fr-ch/products/brilliant-violet-421-anti-mouse-cd11c-antibody-7149?GroupID=BLG11937>

CD11c Brilliant Violet 650 Mouse N418 BioLegend 117339 1:100 <https://www.biolegend.com/en-us/products/brilliant-violet-650-anti-mouse-cd11c-antibody-8840?GroupID=BLG11937>

CD11c Brilliant Violet 650 Human 3.9 BioLegend 301637 1:50 <https://www.biolegend.com/en-us/products/brilliant-violet-650-anti-human-cd11c-antibody-8642>

CD11c PE-Dazzle594 Human 3.9 BioLegend 301641 1:100 <https://www.biolegend.com/en-us/products/pe-dazzle-594-anti-human-cd11c-antibody-10234>

CD116 BUV615 Human hGMCSFR-M1 BD Biosciences 751535 1:200 <https://www.bdbiosciences.com/en-us/products/reagents/flow-cytometry-reagents/research-reagents/single-color-antibodies-ruo/buv615-mouse-anti-human-cd116.751535>

CD123 Brilliant Violet 510 Human 6H6 BioLegend 306021 1:200 <https://www.biolegend.com/en-us/products/brilliant-violet-510-anti-human-cd123-antibody-8524>

CD135 PE Human 4G8 BD Biosciences 558996 1:50 <https://www.bdbiosciences.com/en-us/products/reagents/flow-cytometry-reagents/research-reagents/single-color-antibodies-ruo/pe-mouse-anti-human-cd135.558996>

CD14 APC-Cy7 Human M5E2 BioLegend 301819 1:100 <https://www.biolegend.com/en-us/products/apc-cyanine7-anti-human-cd14-antibody-3293>

CD14 APC-eF750 Human Tuk4 ThermoFisher Scientific MHCD1427 1:400 <https://www.thermofisher.com/antibody/product/CD14-Antibody-clone-TuK4-Monoclonal/MHCD1427>

CD19 AF700 Human SJ25C1 Invitrogen 56019842 1:50 <https://www.thermofisher.com/antibody/product/CD19-Antibody-clone-SJ25C1-Monoclonal/56-0198-42>

CD19 BUV395 Human SJ25-C1 BD Biosciences 563551 1:50 <https://www.bdbiosciences.com/en-us/products/reagents/flow-cytometry-reagents/research-reagents/single-color-antibodies-ruo/buv395-mouse-anti-human-cd19.563551>

CD271/dLNGFR APC Human ME20.4-1.H4 MACS 130-113-418 1:200 <https://www.miltenyibiotec.com/CH-en/products/cd271-Ingfr-antibody-anti-human-me20-4-1-h4.html#conjugate=apc:size=100-tests-in-200-ul>

CD271/dLNGFR AF700 Human ME20.4 BioLegend 345117 1:100 <https://www.biolegend.com/en-us/products/alex-a-fluor-700-anti-human-cd271-ngfr-antibody-16283>

CD271/dLNGFR FITC Human ME20.4-1.H4 MACS 130-113-420 1:200 <https://www.miltenyibiotec.com/CH-en/products/cd271-Ingfr-antibody-anti-human-me20-4-1-h4.html#conjugate=fitc:size=100-tests-in-200-ul>

CD279 Brilliant Violet 510 Mouse 29F 1A12 BioLegend 135241 1:100 <https://www.biolegend.com/en-gb/search-results/brilliant-violet-510-anti-mouse-cd279-pd-1-antibody-14923?GroupID=BLG7928>

CD279 PE Mouse RMP1-30 BioLegend 109104 1:100 <https://www.biolegend.com/fr-ch/products/pe-anti-mouse-cd279-pd-1->

antibody-454?GroupID=BLG4702

CD279 PE-Cy7 Mouse J43 Invitrogen 25-9985-82 1:100 <https://www.thermofisher.com/antibody/product/CD279-PD-1-Antibody-clone-J43-Monoclonal/25-9985-82>

CD3 APC Mouse 17A2 BioLegend 100236 1:100 <https://www.biolegend.com/ja-jp/productstab/apc-anti-mouse-cd3-antibody-8055>

CD3 Brilliant Violet 605 Mouse 17A2 BioLegend 100237 1:100 <https://www.biolegend.com/en-us/search-results/brilliant-violet-605-anti-mouse-cd3-antibody-8503?GroupID=BLG6740>

CD3 Brilliant Violet 650 Mouse 17A2 BioLegend 100229 1:100 <https://www.biolegend.com/en-ie/products/brilliant-violet-650-anti-mouse-cd3-antibody-7843?GroupID=BLG242>

CD3 FITC Mouse 17A2 BioLegend 100204 1:100 <https://www.biolegend.com/en-us/products/fitc-anti-mouse-cd3-antibody-45?GroupID=BLG6732>

CD3 Brilliant Violet 605 Human OKT3 BioLegend 317321 1:100 <https://www.biolegend.com/en-us/products/brilliant-violet-605-anti-human-cd3-antibody-7666>

CD3 AF700 Human HIT3a BioLegend 300323 1:400 <https://www.biolegend.com/en-us/products/alexa-fluor-700-anti-human-cd3-antibody-3417>

CD3 PE Human SK7 BioLegend 344805 1:100 <https://www.biolegend.com/en-us/products/pe-anti-human-cd3-antibody-6511>

CD3 APC-eF780 Human SK7 eBioscience 47-0036-41 1:100 <https://www.thermofisher.com/antibody/product/CD3-Antibody-clone-SK7-Monoclonal/47-0036-41>

CD3 BUV395 Human UCHT1 BD Biosciences 563548 1:50 <https://www.bdbiosciences.com/en-us/products/reagents/flow-cytometry-reagents/research-reagents/single-color-antibodies-ruo/buv395-mouse-anti-human-cd3.563548>

CD335 FITC Human 9E2 BioLegend 331922 1:200 <https://www.biolegend.com/en-us/products/fitc-anti-human-cd335-nkp46-antibody-8464>

CD335 PE Human 9E2 BioLegend 331907 1:100 <https://www.biolegend.com/en-us/products/pe-anti-human-cd335-nkp46-antibody-4577>

CD34 PE-Dazzle594 Human 581 BioLegend 343533 1:100 <https://www.biolegend.com/en-us/products/pe-dazzle-594-anti-human-cd34-antibody-10077>

CD366 Brilliant Violet 711 Mouse RMT3-23 BioLegend 119727 1:100 <https://www.biolegend.com/en-gb/products/brilliant-violet-711-anti-mouse-cd366-tim-3-antibody-14918?GroupID=BLG10656>

CD4 AF700 Mouse RM4-5 BioLegend 100536 1:400 <https://www.biolegend.com/en-us/search-results/alexa-fluor-700-anti-mouse-cd4-antibody-3386?GroupID=BLG4211>

CD4 Alexa Fluor 647 Mouse RM4-5 BioLegend 100530 1:100 <https://www.biolegend.com/en-gb/products/alexa-fluor-647-anti-mouse-cd4-antibody-2696?GroupID=BLG4745>

CD4 AF700 Mouse GK1.5 BioLegend 100430 1:100 <https://www.biolegend.com/en-ie/products/alexa-fluor-700-anti-mouse-cd4-antibody-3385?GroupID=BLG4745>

CD4 Brilliant Violet 605 Mouse RM4-5 BioLegend 100548 1:100 <https://www.biolegend.com/ja-jp/products/brilliant-violet-605-anti-mouse-cd4-antibody-7627?GroupID=BLG4745>

CD4 Brilliant Violet 711 Mouse RM4-5 BioLegend 100550 1:100 <https://www.biolegend.com/en-us/products/brilliant-violet-711-anti-mouse-cd4-antibody-7925?GroupID=BLG4211>

CD4 PE Human/Mouse RM4-5 BioLegend 100512 1:100 <https://www.biolegend.com/en-us/products/pe-anti-mouse-cd4-antibody-482>

CD44 Alexa Fluor 488 Human/Mouse IM7 BioLegend 103016 1:100 <https://www.biolegend.com/fr-ch/explore-new-products/alexa-fluor-488-anti-mouse-human-cd44-antibody-3097?GroupID=BLG10248>

CD44 APC Human/Mouse IM7 BioLegend 103012 1:200 <https://www.biolegend.com/en-us/products/apc-anti-mouse-human-cd44-antibody-312>

CD44 PerCP-Cy 5.5 Mouse IM7 BioLegend 103032 1:100 <https://www.biolegend.com/en-us/search-results/percp-cyanine5-5-anti-mouse-human-cd44-antibody-5605?GroupID=BLG10248>

CD45 APC Mouse 30-F11 eBioscience 17-0451-82 1:100 <https://www.thermofisher.com/antibody/product/CD45-Antibody-clone-30-F11-Monoclonal/17-0451-82#:~:text=17%2D0451%2D83%20was%20used,diagnosis%20and%20prognosis%20of%20mesothelioma.>

CD45 APC Mouse 30-F11 BioLegend 103112 1:100 <https://www.biolegend.com/en-ie/products/apc-anti-mouse-cd45-antibody-97>

CD45 Brilliant Violet 510 Mouse 30-F11 BioLegend 103138 1:400 <https://www.biolegend.com/fr-lu/cell-health/brilliant-violet-510-anti-mouse-cd45-antibody-7995>

CD45 Pacific Blue Mouse 30-F11 BioLegend 103126 1:100 <https://www.biolegend.com/en-gb/search-results/pacific-blue-anti-mouse-cd45-antibody-3102?GroupID=BLG6841>

CD45 PE Mouse 30-F11 BioLegend 103106 1:100 <https://www.biolegend.com/en-us/products/pe-anti-mouse-cd45-antibody-100>

CD45.1 FITC Mouse A20 Invitrogen 11-0453-82 1:100 <https://www.thermofisher.com/antibody/product/CD45-1-Antibody-clone-A20-Monoclonal/11-0453-82>

CD45.1 PE Mouse A20 Invitrogen 12-0453-82 1:100 <https://www.thermofisher.com/antibody/product/CD45-1-Antibody-clone-A20-Monoclonal/12-0453-82>

CD45.1 PE-Cy7 Mouse 104 BioLegend 110730 1:100 <https://www.biolegend.com/fr-fr/products/pe-cyanine7-anti-mouse-cd45-1-antibody-4917?GroupID=BLG1933>

CD45.2 APC Mouse 104 eBioscience 17-0454-82 1:100 <https://www.thermofisher.com/antibody/product/CD45-2-Antibody-clone-104-Monoclonal/17-0454-82>

CD45.2 APC-Cy7 Mouse 104 BioLegend 109824 1:100 <https://www.biolegend.com/nl-nl/products/apc-cyanine7-anti-mouse-cd45-2-antibody-3906>

CD45.2 APC-eFluor 780 Mouse 104 eBioscience 47-0454-82 1:100 <https://www.thermofisher.com/antibody/product/CD45-2-Antibody-clone-104-Monoclonal/47-0454-82>

CD45.2 Pacific Blue Mouse 104 eBioscience 109820 1:100 <https://www.biolegend.com/en-us/products/pacific-blue-anti-mouse-cd45-2-antibody-3108?GroupID=BLG1934>

CD45.2 PE Mouse 104 Invitrogen 12-0454-82 1:100 <https://www.thermofisher.com/antibody/product/CD45-2-Antibody-clone-104-Monoclonal/12-0454-82>

CD45R Brilliant Violet 605 Mouse RA3-6B2 BioLegend 103244 1:100 <https://www.biolegend.com/en-us/products/brilliant-violet-605-anti-mouse-human-cd45r-b220-antibody-7870?GroupID=GROUP20>

CD45RA BUV737 Human HI100 BD Biosciences 612846 1:400 <https://www.bdbiosciences.com/en-us/products/reagents/flow-cytometry-reagents/research-reagents/single-color-antibodies-ruo/buv737-mouse-anti-human-cd45ra.612846>

CD62L Alexa Fluor 488 Mouse MEL-14 BioLegend " 104420" 1:100 <https://www.biolegend.com/fr-fr/products/alexa-fluor-488-anti-mouse-cd62l-antibody-3115?GroupID=GROUP20>

CD62L PE-Cy7 Mouse MEL-14 BioLegend 104418 1:100 <https://www.biolegend.com/en-us/products/pe-cyanine7-anti-mouse-cd62l-antibody-1922?GroupID=BLG10670>

CD62L PE/Dazzle Mouse MEL-14 BioLegend 104448 1:200 <https://www.biolegend.com/de-de/products/pe-dazzle-594-anti-mouse-cd62l-antibody-12137>

CD64 Brilliant Violet 711 Mouse X54-5/7.1 BioLegend 139311 1:100 <https://www.biolegend.com/fr-ch/products/brilliant-violet-711-anti-mouse-cd64-fcgmari-antibody-9920?GroupID=BLG8805>

CD66b FITC Human G10F5 BioLegend 305103 1:400 <https://www.biolegend.com/en-us/products/fitc-anti-human-cd66b-antibody-666>

CD66b PE Human G10F5 BioLegend 305106 1:400 <https://www.biolegend.com/en-us/products/pe-anti-human-cd66b-antibody-6529>

CD86 APC-Cy7 Mouse GL-1 BioLegend 553030 1:100 <https://www.biolegend.com/en-us/products/apc-cyanine7-anti-mouse-cd86-antibody-6554?GroupID=BLG11928>

CD86 Pacific Blue Human IT2.2 BioLegend 305417 1:100 <https://www.biolegend.com/en-us/products/pacific-blue-anti-human-cd86-antibody-3357>

CD86 Pacific Blue Mouse GL-1 BioLegend 105022 1:100 <https://www.biolegend.com/en-us/products/pacific-blue-anti-mouse-cd86-antibody-3122>

CD8a PerCp-Cy5.5 Mouse 53-6.7 BioLegend 100734 1:400 <https://www.biolegend.com/nl-be/products/percp-cyanine5-5-anti-mouse-cd8a-antibody-4255>

CD8a Alexa Fluor 700 Mouse 53-6.7 eBioscience 56-0081-82 1:100 <https://www.thermofisher.com/antibody/product/CD8a-Antibody-clone-53-6-7-Monoclonal/56-0081-82>

CD8a APC-Cy7 Mouse 53-6.7 BioLegend 100714 1:100 <https://www.biolegend.com/en-gb/diagnostic-1/apc-cyanine7-anti-mouse-cd8a-antibody-2269>

CD8a Brilliant Violet 605 Mouse 53-6.7 BioLegend 100744 1:100 <https://www.biolegend.com/en-us/productstab/brilliant-violet-605-anti-mouse-cd8a-antibody-7636>

CD8a Brilliant Violet 510 Mouse 53-6.7 BioLegend 100752 1:100 <https://www.biolegend.com/en-ie/cell-health/brilliant-violet-510-anti-mouse-cd8a-antibody-7992>



CD8a FITC Mouse 53-6.7 Invitrogen 553030 1:100 <https://wwwbdbiosciences.com/en-ch/products/reagents/flow-cytometry-reagents/research-reagents/single-color-antibodies-ruo/fits-rat-anti-mouse-cd8a.553030>

CD8a PE Mouse 53-6.7 Invitrogen 12-0081-82 1:100 <https://www.thermofisher.com/antibody/product/CD8a-Antibody-clone-53-6-7-Monoclonal/12-0081-82>

CD8a PerCP-Cy 5.5 Human SK1 BioLegend 353803 1:400 <https://www.biolegend.com/en-us/products/percp-cyanine5-5-anti-human-cd8-antibody-6389>

CLEC9A APC Human 8F9 BioLegend 353806 1:200 <https://www.biolegend.com/en-us/products/apc-anti-human-cd370-clec9a-dngr1-antibody-11714>

F4/80 Alexa Fluor 488 Mouse BM8 BioLegend 123120 1:100 <https://www.biolegend.com/en-us/products/alexa-fluor-488-anti-mouse-f4-80-antibody-4073>

F4/80 APC Mouse BM8 BioLegend 123116 1:100 <https://www.biolegend.com/en-us/products/apc-anti-mouse-f4-80-antibody-4071>

F4/80 APC-Cy7 Mouse BM8 BioLegend 123118 1:100 <https://www.biolegend.com/en-us/products/apc-cyanine7-anti-mouse-f4-80-antibody-4072>

F4/80 PE-Cy7 Mouse BM8 BioLegend 123114 1:200 <https://www.biolegend.com/en-us/productstab/pe-cyanine7-anti-mouse-f4-80-antibody-4070?GroupID=BLG5319>

Granzyme B PE-Texas Red Human/Mouse GB11 ThermoFisher Scientific GRB17 1:100 <https://www.thermofisher.com/antibody/product/Granzyme-B-Antibody-clone-GB11-Monoclonal/GRB17>

GD2 APC Mouse/Human 14G2A BioLegend 357305 1:100. <https://www.biolegend.com/fr-ch/products/apc-anti-human-ganglioside-gd2-antibody-9298>

HLA-A/B/C PerCp-Cy5.5 Human W6/32 BioLegend 311419 1:400 <https://www.biolegend.com/en-us/products/percp-cyanine5-5-anti-human-hla-a-b-c-antibody-7057>

HLA-A2 PE-Cy7 Human BB7.2 BioLegend 343313 1:100 <https://www.biolegend.com/en-us/products/pe-cyanine7-anti-human-hla-a2-antibody-8184>

HLA-DR PerCp-Cy5.5 Human L243 BioLegend 307629 1:200 <https://www.biolegend.com/en-us/products/percp-cyanine5-5-anti-human-hla-dr-antibody-4246>

IFN- $\gamma$  APC Mouse XMG1.2 BD Biosciences 562018 1:100 <https://wwwbdbiosciences.com/en-au/products/reagents/flow-cytometry-reagents/research-reagents/single-color-antibodies-ruo/apc-rat-anti-mouse-ifn.562018>

IFN- $\gamma$  APC Mouse XMG1.2 BioLegend 505810 1:200 <https://www.biolegend.com/en-us/products/apc-anti-mouse-ifn-gamma-antibody-993?GroupID=GROUP24>

IFN- $\gamma$  PE-Cy7 Human 4S.B3 BD Biosciences 561036 1:200 <https://wwwbdbiosciences.com/en-us/products/reagents/flow-cytometry-reagents/research-reagents/single-color-antibodies-ruo/pe-cy-7-mouse-anti-human-ifn.561036>

ISO PE-Cy7 Human MPC-11 BioLegend 400325 1:50 <https://www.biolegend.com/en-us/products/pe-cyanine7-mouse-igg2b-kappa-isotype-ctrl-1928>

ISO PerCp-Cy5.5 Human MOPC-173 BioLegend 400257 1:800 <https://www.biolegend.com/en-us/products/percp-cyanine5-5-mouse-igg2a-kappa-isotype-ctrl-4207>

Ly6C Alexa Fluor 700 Mouse HK1.4 BioLegend 128024 1:100 <https://www.biolegend.com/en-us/products/alexa-fluor-700-anti-mouse-ly-6c-antibody-6757>

Ly6C Brilliant Violet 605 Mouse HK1.4 BioLegend 128035 1:100 <https://www.biolegend.com/en-us/products/brilliant-violet-605-anti-mouse-ly-6c-antibody-8727>

Ly6C Brilliant Violet 711 Mouse HK1.4 BioLegend 128037 1:100 <https://www.biolegend.com/en-us/products/brilliant-violet-711-anti-mouse-ly-6c-antibody-8935>

Ly6C Brilliant Violet 650 Mouse HK1.4 BioLegend 128049 1:200 <https://www.biolegend.com/en-us/products/brilliant-violet-650-anti-mouse-ly-6c-antibody-17378>

Ly6G Brilliant Violet 605 Mouse 1A8 BioLegend " 127639" 1:100 <https://www.biolegend.com/en-us/products/brilliant-violet-605-anti-mouse-ly-6g-antibody-12244>

Ly6G Pacific Blue Mouse 1A8 BioLegend 127611 1:100 <https://www.biolegend.com/en-us/products/pacific-blue-anti-mouse-ly-6g-antibody-6082>

MHC class II APC-Cy7 Mouse M5/114.15.2 BioLegend 107628 1:100 <https://www.biolegend.com/en-us/products/apc-cyanine7-anti-mouse-i-a-i-e-antibody-5966>

MHC class II FITC Mouse M5/114.15.2 Invitrogen 11-5321-85 1:100 <https://www.thermofisher.com/antibody/product/MHC-Class-II-I-A-I-E-Antibody-clone-M5-114-15-2-Monoclonal/11-5321-85>

MHC class II Pacific Blue Mouse M5/114.15.2 BioLegend 107620 1:100 <https://www.biolegend.com/en-us/products/pacific-blue-anti-mouse-i-a-i-e-antibody-3136?GroupID=BLG11931>

MHC class II PE Mouse M5/114.15.2 ThermoFisher Scientific A14763 1:100 <https://www.thermofisher.com/antibody/product/I-A-I-E-Antibody-clone-M5-114-15-2-Monoclonal/A14763>

MHC class II Pe-Cy5 Mouse M5/114.15.2 BioLegend 107612 1:100 <https://www.biolegend.com/de-at/products/pe-cyanine5-anti-mouse-i-a-i-e-antibody-2487?GroupID=BLG11931>

MHC class II PE-Cy7 Mouse M5/114.15.2 BioLegend 107629 1:100 <https://www.biolegend.com/fr-fr/products/pe-cyanine7-anti-mouse-i-a-i-e-antibody-6136>

MHC class II PerCP-Cy 5.5 Mouse M5/114.15.2 BioLegend 107625 1:200 <https://www.biolegend.com/nl-nl/products/percp-cyanine5-5-anti-mouse-i-a-i-e-antibody-4282>

NK 1.1 AF488 Mouse PK136 BioLegend 108706 1:200 <https://www.biolegend.com/en-us/products/fitc-anti-mouse-nk-1-1-antibody-429>

NK 1.1 Brilliant Violet 711 Mouse PK136 BioLegend 108745 1:200 <https://www.biolegend.com/en-us/products/brilliant-violet-711-anti-mouse-nk-1-1-antibody-9576>

NK1.1 PE-Cy7 Mouse PK136 BioLegend 108714 1:100 <https://www.biolegend.com/en-us/soluble-mhc/pe-cyanine7-anti-mouse-nk-1-1-antibody-2840>

TCR $\beta$  Brilliant Violet 650 Mouse H57-597 BioLegend 109251 1:400 <https://www.biolegend.com/en-us/products/brilliant-violet-650-anti-mouse-tcr-beta-chain-antibody-17652>

TIM-3 Brilliant Violet 711 Mouse RMT3-23 BioLegend 119727 1:100 <https://www.biolegend.com/en-gb/products/brilliant-violet-711-anti-mouse-cd366-tim-3-antibody-14918?GroupID=BLG10656>

TNF $\alpha$  A700 Mouse MAb11 BD Biosciences 561023 1:100 <https://www.bdbiosciences.com/en-ch/products/reagents/flow-cytometry-reagents/research-reagents/single-color-antibodies-ruo/alexa-fluor-700-mouse-anti-human-tnf.561023>

TNF $\alpha$  PE-Cy7 Mouse MP6-XT22 BioLegend 506324 1:100 <https://www.biolegend.com/de-at/products/pe-cyanine7-anti-mouse-tnf-alpha-antibody-5866?GroupID=GROUP24>

TNF $\alpha$  PE/Dazzle Human MAb11 BD Biosciences 561023 1:100 <https://www.bdbiosciences.com/en-us/products/reagents/flow-cytometry-reagents/research-reagents/single-color-antibodies-ruo/alexa-fluor-700-mouse-anti-human-tnf.561023>

XCR1 Brilliant Violet 510 Mouse/Rat ZET BioLegend 148218 1:100 <https://www.biolegend.com/fr-lu/products/brilliant-violet-510-anti-mouse-rat-xcr1-antibody-10751>

XCR1 PE Mouse ZET BioLegend 148204 1:200 <https://www.biolegend.com/en-us/clone-search/pe-anti-mouse-rat-xcr1-antibody-10217?GroupID=GROUP20>

$\beta$ 2-microglobulin PE Mouse A16041A BioLegend 154503 1:100 <https://www.biolegend.com/fr-ch/products/pe-anti-mouse-beta2-microglobulin-antibody-15126?GroupID=ImportedGROUP1>

F4/80 PE Mouse BM8 BioLegend 123109 1:50 <https://www.biolegend.com/en-us/products/pe-anti-mouse-f4-80-antibody-4068>

CD8a APC Mouse 53-6.7 BD Bioscience 561093 1:50 <https://www.bdbiosciences.com/en-us/products/reagents/flow-cytometry-reagents/research-reagents/single-color-antibodies-ruo/apc-rat-anti-mouse-cd8a.561093>

CD8b APC Mouse YTS156.7.7 BioLegend 126613 1:50 <https://www.biolegend.com/en-us/products/apc-anti-mouse-cd8b-antibody-9055>

CD3e PE Mouse OKT3 BioLegend 317308 1:100 <https://www.biolegend.com/en-us/products/pe-anti-human-cd3-antibody-3645>

CD3 PE Mouse 500A2 BD Bioscience 553240 1:50 <https://www.bdbiosciences.com/en-us/products/reagents/flow-cytometry-reagents/research-reagents/single-color-antibodies-ruo/pe-hamster-anti-mouse-cd3e.553240>

NKp46 PE Mouse 29A1.4 BioLegend 137603 1:50 <https://www.biolegend.com/en-us/products/pe-anti-mouse-cd335-nkp46-antibody-6523>

GFP Unconj. GFP polyclonal Proteintech 50430-2-AP 1:200 <https://www.ptglab.com/products/eGFP-Antibody-50430-2-AP.htm>  
CD31 Unconj. Mouse polyclonal LifeSpan Biosciences LS-C150165 1:300 <https://www.lsbio.com/targets/target/g3760?removedcatalog=LS-C150165&prefix=a>

Secondary (for GFP) AF488 Rabbit polyclonal ThermoFisher A-21206 1:500 <https://www.thermofisher.com/antibody/product/Donkey-anti-Rabbit-IgG-H-L-Highly-Cross-Adsorbed-Secondary-Antibody-Polyclonal/A-21206>

Secondary (for CD31) AF488 Goat polyclonal ThermoFisher A-11055 1:500 <https://www.thermofisher.com/antibody/product/Donkey-anti-Goat-IgG-H-L-Cross-Adsorbed-Secondary-Antibody-Polyclonal/A-11055>

|                                                                                                                                                                                                                                                                                                                                                                                                                                                                                                                                                                             |
|-----------------------------------------------------------------------------------------------------------------------------------------------------------------------------------------------------------------------------------------------------------------------------------------------------------------------------------------------------------------------------------------------------------------------------------------------------------------------------------------------------------------------------------------------------------------------------|
| CD8a Unconj. Mouse H2(20) Cell signaling 98941S 1:400 <a href="https://www.cellsignal.com/products/primary-antibodies/cd8a-d4w2z-xp-rabbit-mab/98941?_requestid=429297&amp;gclid=CjwKCAjwjaWoBhAmEiwAXz8DBaAmzYX7MrLyEhP4yt8lldLyCsvg3c8OP2gyoJ_IJs0ysTRg0TXBoC6g0QAvD_BwE&amp;gclsrc=aw.ds&amp;_requestid=2408425">https://www.cellsignal.com/products/primary-antibodies/cd8a-d4w2z-xp-rabbit-mab/98941?_requestid=429297&amp;gclid=CjwKCAjwjaWoBhAmEiwAXz8DBaAmzYX7MrLyEhP4yt8lldLyCsvg3c8OP2gyoJ_IJs0ysTRg0TXBoC6g0QAvD_BwE&amp;gclsrc=aw.ds&amp;_requestid=2408425</a> |
| CD4 Unconj. Mouse 14-9766 eBioscience 14-9766 1:1000 <a href="https://www.thermofisher.com/antibody/product/CD4-Antibody-clone-4SM95-Monoclonal/14-9766-82">https://www.thermofisher.com/antibody/product/CD4-Antibody-clone-4SM95-Monoclonal/14-9766-82</a>                                                                                                                                                                                                                                                                                                                |
| Secondary (for CD8a) HRP* Rabbit polyclonal Agilent DAKO P044801-2 1:300 <a href="https://www.agilent.com/en/product/specific-proteins/elisa-kits-accessories/goat-anti-rabbit-immunoglobulins-hrp-affinity-isolated-2717113">https://www.agilent.com/en/product/specific-proteins/elisa-kits-accessories/goat-anti-rabbit-immunoglobulins-hrp-affinity-isolated-2717113</a>                                                                                                                                                                                                |
| Secondary (for CD4) HRP** Rat polyclonal Jackson Immuno Research 312-005-045 1:1000 <a href="https://www.jacksonimmuno.com/catalog/products/312-005-045">https://www.jacksonimmuno.com/catalog/products/312-005-045</a>                                                                                                                                                                                                                                                                                                                                                     |
| * HRP signal was revealed by Opal 620 reagent pack (FP1495001KT). <a href="https://my.akoyabio.com/ccrz__ProductDetails?sku=FP1495001KT&amp;cclcl=en_US">https://my.akoyabio.com/ccrz__ProductDetails?sku=FP1495001KT&amp;cclcl=en_US</a>                                                                                                                                                                                                                                                                                                                                   |
| ** HRP signal was revealed by Opal 540 reagent pack (FP1494001KT). <a href="https://my.akoyabio.com/ccrz__ProductDetails?sku=FP1494001KT&amp;cclcl=en_US">https://my.akoyabio.com/ccrz__ProductDetails?sku=FP1494001KT&amp;cclcl=en_US</a>                                                                                                                                                                                                                                                                                                                                  |

## Eukaryotic cell lines

Policy information about [cell lines](#) and [Sex and Gender in Research](#)

|                                                                   |                                                                                                                                                                                                                                                                                                                                                                                                                                                                                                                                                                                                                                            |
|-------------------------------------------------------------------|--------------------------------------------------------------------------------------------------------------------------------------------------------------------------------------------------------------------------------------------------------------------------------------------------------------------------------------------------------------------------------------------------------------------------------------------------------------------------------------------------------------------------------------------------------------------------------------------------------------------------------------------|
| Cell line source(s)                                               | 293T cells were obtained from Dr. Luigi Naldini (San Raffaele Institute, Milan, Italy) and maintained in the De Palma laboratory. Phoenix-Eco cells were obtained from ATCC (cat. CRL-3214) and maintained in the Migliorini laboratory. MC38 colorectal carcinoma cells and B16F10 melanoma cells modified to express OVA were obtained from Pedro Romero (University of Lausanne, Switzerland). SB28 glioma cells available in the Migliorini laboratory were generated by Hideho Okada (UCSF, CA); these cells express both luciferase and GFP.                                                                                         |
| Authentication                                                    | While the original stocks of cancer cell lines were authenticated, we did not perform further authentication in the past several years. However, the cell lines appeared authentic based on their morphology and growth behavior in vitro and in vivo, especially with respect to ability to form tumors in mice, expression of defined fluorescent or bioluminescent genes, and gene expression. In particular, 293T and Phoenix-Eco cells supported high titer LV and RV production; B16F10 cells were validated as melanoma cells by RNA-Seq analysis; and SB28 cells expressed luciferase and GFP and formed invasive gliomas in mice. |
| Mycoplasma contamination                                          | All cell lines have tested negative for Mycoplasma contamination in tests routinely performed in the laboratory.                                                                                                                                                                                                                                                                                                                                                                                                                                                                                                                           |
| Commonly misidentified lines (See <a href="#">ICLAC</a> register) | None                                                                                                                                                                                                                                                                                                                                                                                                                                                                                                                                                                                                                                       |

## Animals and other research organisms

Policy information about [studies involving animals](#); [ARRIVE guidelines](#) recommended for reporting animal research, and [Sex and Gender in Research](#)

|                         |                                                                                                                                                                                                                                                                                                                                                                                                                                                                                                                                                                                                                                                                                                                                                                                                                                                                                                                                                                                                                                                                                                                                                                                                                                                                                                                                                                                                                                                                                                                                                                                                                                                                                                                                                                                                                                        |
|-------------------------|----------------------------------------------------------------------------------------------------------------------------------------------------------------------------------------------------------------------------------------------------------------------------------------------------------------------------------------------------------------------------------------------------------------------------------------------------------------------------------------------------------------------------------------------------------------------------------------------------------------------------------------------------------------------------------------------------------------------------------------------------------------------------------------------------------------------------------------------------------------------------------------------------------------------------------------------------------------------------------------------------------------------------------------------------------------------------------------------------------------------------------------------------------------------------------------------------------------------------------------------------------------------------------------------------------------------------------------------------------------------------------------------------------------------------------------------------------------------------------------------------------------------------------------------------------------------------------------------------------------------------------------------------------------------------------------------------------------------------------------------------------------------------------------------------------------------------------------|
| Laboratory animals      | All studies used C57Bl/6 mice (CD45.2 wild-type; CD45.1 wild-type; Batf3 <sup>-/-</sup> ; Rag1 <sup>-/-</sup> ). C57Bl/6 (CD45.2) mice were purchased from Charles River Laboratories (France). C57Bl/6 (CD45.1), Batf3 <sup>-/-</sup> and Rag1 <sup>-/-</sup> mice were maintained as stable colonies in the EPFL mouse facility. All mice were housed in groups of up to 5 mice/cage at 18-24 degrees C (ambient temperature), with 40-60% humidity, and maintained on a 12 h light/dark cycle (6 am to 6 pm). Food and water were available ad libitum. Experiments involving subcutaneous tumor models used cohorts of 6-9 weeks old female mice. Glioma studies were performed twice, once in female and once in male C57Bl/6 mice (all 6-8 weeks old). The liver cancer studies used 8-9 weeks old male C57Bl/6 mice. BM cells were isolated from female mice. The mice with subcutaneous tumors were monitored 3 times per week. The tumors were allowed to grow up to 1 cm <sup>3</sup> in size. Upon reaching the endpoint tumor size, the experiments could continue for additional 48h provided that all health parameters detailed in a health score sheet remained normal. Long (D) and short (d) tumor diameters were measured with a caliper and the tumor volume calculated using the following formula: tumor volume = ½ x d <sup>2</sup> x D. Termination criteria in the liver tumor models were defined by authority-confined endpoints (morbidity; non-physiological posture; indication of jaundice, cramps, or emaciation; weight loss of more than 20% of the initial weight). Termination criteria in the intracranial glioma model were defined by authority-confined endpoints (15% weight loss over one week; compromised ability to walk, eat or drink; dyspnea; hunched posture; or lethargic behavior). |
| Wild animals            | The study did not involve wild animals.                                                                                                                                                                                                                                                                                                                                                                                                                                                                                                                                                                                                                                                                                                                                                                                                                                                                                                                                                                                                                                                                                                                                                                                                                                                                                                                                                                                                                                                                                                                                                                                                                                                                                                                                                                                                |
| Reporting on sex        | Experiments involving subcutaneous tumor models used female mice. Glioma studies were performed twice, once in female and once in male mice. The liver cancer studies used male mice.                                                                                                                                                                                                                                                                                                                                                                                                                                                                                                                                                                                                                                                                                                                                                                                                                                                                                                                                                                                                                                                                                                                                                                                                                                                                                                                                                                                                                                                                                                                                                                                                                                                  |
| Field-collected samples | None                                                                                                                                                                                                                                                                                                                                                                                                                                                                                                                                                                                                                                                                                                                                                                                                                                                                                                                                                                                                                                                                                                                                                                                                                                                                                                                                                                                                                                                                                                                                                                                                                                                                                                                                                                                                                                   |

## Ethics oversight

The studies conducted at EPFL (De Palma's laboratory) were performed according to protocols approved by the Veterinary Authorities of the Canton Vaud according to Swiss law (protocols VD3154, VD3154.1, VD3785). The studies conducted at UNIGE (Migliorini's laboratory; brain glioma model) were performed according to protocols approved by the Veterinary Authorities of the Canton Geneva according to Swiss law (protocol VD3717c). The studies conducted at DKFZ (Heikenwälder's laboratory; liver cancer models) were performed according to protocols approved by the Regierungspräsidium Karlsruhe according to German law (protocols G275/18, G5/19 and DKFZ332). All studies were compliant with the humane endpoints established in the above authorizations.

Note that full information on the approval of the study protocol must also be provided in the manuscript.

## Flow Cytometry

### Plots

Confirm that:

- The axis labels state the marker and fluorochrome used (e.g. CD4-FITC).
- The axis scales are clearly visible. Include numbers along axes only for bottom left plot of group (a 'group' is an analysis of identical markers).
- All plots are contour plots with outliers or pseudocolor plots.
- A numerical value for number of cells or percentage (with statistics) is provided.

### Methodology

#### Sample preparation

##### Processing of subcutaneous tumors for flow cytometry

Tumors were excised, chopped, and enzymatically digested with collagenase IV (0.2 mg/ml; Worthington), dispase (2 mg/ml; Life Technologies), and DNase I (0.1 mg/ml; New England Biolabs), in DMEM medium, for 30 min at 37°C. Filtered single cells were washed with PBS and transferred to 96 u-bottom wells for staining with flow cytometry antibodies.

##### Processing of hematopoietic and lymphoid organs for flow cytometry

Spleens, tumor- or liver-draining lymph nodes (tdLNs and IdLNs, respectively) were smashed gently and thoroughly on a 70 µm cell strainer and RBCs were depleted RBC lysis buffer (Sigma). Single-cell suspensions were washed in PBS and transferred to 96 u-bottom wells for staining with antibodies.

##### Processing of liver and lung tissue for flow cytometry

Liver cells were isolated by mechanical dissociation followed by enzymatic digestion for 40 min at 37°C in RPMI medium with collagen IV (final concentration: 60 U) and DNase I (final concentration: 25 µg/ml). After washing in PBS, leukocytes were isolated by Percoll (Sigma-Aldrich; GE17-0891-01) gradient (40-80% Percoll/HBSS) centrifugation for 15 min at 1,800xg at 4°C. Enriched leukocytes were collected, washed in FACS buffer, and counted (CountBright™ Absolute Counting Beads; Thermo Fisher; C36950) before staining with antibodies. Lungs were harvested and digested with the mouse lung dissociation kit (Miltenyi Biotec) using gentleMACS tissue dissociator (Miltenyi Biotec). RBCs were lysed with RBC lysis buffer (Sigma) before staining with antibodies.

##### Ex vivo restimulation of cells for flow cytometry

For ex vivo re-stimulation of immune cells, cells were re-stimulated with phorbol 12-myristate 13-acetate (PMA; 10 ng/ml; Sigma-Aldrich; P2696) and ionomycin (500 ng/ml; Sigma-Aldrich; I0634) in RPMI medium for 30 minutes, followed by Golgi Stop (BD Biosciences; Cat No. 554715) and Golgi plug (BD Biosciences; Cat No. 555028) for 3h. Cells were then stained for intracellular cytokines (BD Biosciences; Cat No. 554715). Liver-derived cells were incubated for 2h in RPMI medium containing the "cell activation cocktail" with brefeldin A (1:500; Biolegend; 423304) and monensin solution (1:1,000; Biolegend; 420701), before flow cytometry analysis.

#### Instrument

BD LSRFortessa™, BD® LSR II SORP, and Invitrogen Attune™ NxT were used for acquisition of flow cytometry data.

#### Software

For flow cytometry analysis, we employed FlowJo, LLC V10.1.

#### Cell population abundance

Cell sorting used a BD FACSAria™ Fusion Flow Cytometer. Enriched cell populations were used for functional assays or tumor growth and not for analytical studies.

#### Gating strategy

Gating strategies are shown in Supplementary Figures 1-7.

##### MOUSE CELLS:

##### Spleen:

- cDCs: CD11chighMHCII+
- cDC1: CD11chighMHCII+CD8a+CD11b-
- cDC2: CD11chighMHCII+CD8a--CD11b+
- Double-negative (DN) cDCs: CD11chighMHCII+CD8a-CD11b-
- CD8+ T-effector: CD3+CD8+CD44+CD62L-
- CD4+ T-effector: CD3+CD4+CD44+CD62L-

##### Tumor:

- cDCs: Ly6C-F4/80-CD11c+MHCII+
- cDC1: Ly6C-F4/80-CD11c+MHCII+CD103+CD11b-; Ly6C-F4/80-CD11c+MHCII+XCR1+CD11b-
- cDC2: Ly6C-F4/80-CD11c+MHCII+CD103-CD11b+; Ly6C-F4/80-CD11c+MHCII+XCR1-CD11b+
- Macrophages: CD11b+F4/80+

- M1-like macrophages: CD11b+F4/80+MHCII+; CD11b+F4/80+MHCII+CD86+  
 - CD8+ T: CD3+CD8+; CD11b-CD3+CD8+CD4-; NK1.1-CD3+CD8+CD4-  
 - CD4+ T: CD3+CD4+; CD11b-CD3+CD8-CD4+  
 - NK: CD11b-NK1.1+; CD3-NK1.1+  
 - NKT: CD3+NK1.1+  
 - Neutrophils: Ly6C+Ly6G+  
 TdLN:  
 - cDCs: CD11c+/highMHCII+  
 - cDC1: CD11c+/highMHCII+CD8a+CD11b-  
 - cDC2: CD11c+/high MHCII+CD8a-CD11b+  
 - CD8+ T-effector: CD3+CD8+CD44+CD62L-; MHCII-CD3+CD8+CD44+CD62L-  
 - CD4+ T-effector: CD3+CD4+CD44+CD62L-; MHCII-CD3+CD4+CD44+CD62L-  
 Lung  
 - cDCs: Ly6C-F4/80-CD11c+MHCII+  
 - cDC1: Ly6C-F4/80-CD11c+MHCII+CD103+CD11b-  
 - cDC2: Ly6C-F4/80-CD11c+MHCII+CD103-CD11b+  
 - Macrophages: CD11b+F4/80+  
 Liver:  
 - NK: CD45+TCRβ-NK1.1+  
 - cDCs: CD45+CD11b+F4/80-CD11c+MHCII+  
 - Monocytes: CD45+CD11b+F4/80-CD11c-  
 - Kupffer cells: CD45+CD11b+F4/80+  
 - CD8+ T: CD45+TCRβ+NK1.1-CD8+  
 - CD4+ T: CD45+TCRβ+NK1.1-CD4+  
 - IFNγ+ CD8+ T: CD45+TCRβ+NK1.1-CD8+IFNγ+  
 - CD8+ T-effector: CD45+TCRβ+NK1.1-CD8+CD44+CD62L-  
 - CD4+ T-effector: CD45+TCRβ+NK1.1-CD4+CD44+CD62L-  
 Spleen and IdLN (liver cancer models):  
 - CD8+ T-effector: CD45+TCRβ+NK1.1-CD8+CD44+CD62L-  
 - CD4+ T-effector: CD45+TCRβ+NK1.1-CD4+CD44+CD62L-  
 HUMAN CELLS:  
 Human hematopoietic progenitors (day 7 cultures):  
 - CMP (Lin-CD34+CD115-CD1c-CD303-CD141-CD123-CD117+CD135+CD116-CD45RA-)  
 - GMDP (Lin-CD34+CD115-CD1c-CD303-CD141-CD123-CD117+CD135+CD116-CD45RA+)  
 - MDP (Lin-CD34+CD115+CD1c-CD303-CD141-CD123-CD117+CD135+CD116-CD45RA+)  
 - CDP (Lin-CD34+CD115-CD1c-CD303-CD141-CD123+CD117+CD135+CD116+CD45RA+)  
 - Pre-DC (Lin-CD34-CD115-CD1c-CD303-CD141-CD123-CD117+CD135+CD116+CD45RA+)  
 Human cells (day-14 cultures):  
 APCs  
 - Monocytes: CD66b-CD3-CD19-CD14+  
 - cDC1: CD66b-CD3-CD19-CD14-CD141+CLEC9A+  
 - Immature DCs: CD66b-CD3-CD19-CD14-CD141+CLEC9A-  
 - cDC2: CD66b-CD3-CD19-CD14-CD141-CLEC9A-CD1c+  
 Other cells  
 - Granulocytes: CD66b+  
 - T cells: CD66b-CD3+  
 - B cells: CD66b-CD3-CD19+  
 - Other cells: CD66b-CD3-CD19-CD14-CD141-CLEC9A-CD1c-

Tick this box to confirm that a figure exemplifying the gating strategy is provided in the Supplementary Information.
